# Supplementary material for: Bloom evenness modulates the influence of bloom abundance on insect community structure in suburban gardens
Source: PeerJ. 2021 Apr 22;9:e11132. doi: 10.7717/peerj.11132 (PMC8071070; doi:10.7717/peerj.11132)
Supplement: Supplemental Information 4 — Raw data from insect bowl surveys. Relevant categories included date, location, order, and family. Species of insect were recorded for some bowls surveys, but not others, so we did not include this information in our article. [file peerj-09-11132-s004.xlsx]

## Sheet: Sheet1
Primary Key	Day	Month	Year	Site	Color	Order	Family	Species	# of individuals
60543	16	4	2013	Location 1	B	Diptera	Dolichopodidae		9
60543	16	4	2013	Location 1	B	Diptera	Chloropidae		1
60543	16	4	2013	Location 1	B	Diptera	Sciaridae		4
60543	16	4	2013	Location 1	B	Hymenoptera	Eurytomidae		1
60543	16	4	2013	Location 1	B	Hymenoptera	Formicidae		1
60543	16	4	2013	Location 1	B	Coleoptera	Chrysomelidae		1
91863	16	4	2013	Location 1	R	Diptera	Sciaridae		2
91863	16	4	2013	Location 1	R	Hemiptera	Cicadellidae		2
91863	16	4	2013	Location 1	R	Coleoptera	Curculionidae		1
91863	16	4	2013	Location 1	R	Coleoptera	Staphylinidae		1
43819	16	4	2013	Location 1	Y	Diptera	Agromyzidae		1
43819	16	4	2013	Location 1	Y	Diptera	Dolichopodidae		8
43819	16	4	2013	Location 1	Y	Diptera	Drosophilidae		2
43819	16	4	2013	Location 1	Y	Diptera	Chloropidae		1
43819	16	4	2013	Location 1	Y	Diptera	Phoridae		2
43819	16	4	2013	Location 1	Y	Diptera	Sciaridae		2
43819	16	4	2013	Location 1	Y	Diptera	Tachinidae		1
43819	16	4	2013	Location 1	Y	Hymenoptera	Ichneumonidae		1
43819	16	4	2013	Location 1	Y	Hymenoptera	Platygastridae		1
43819	16	4	2013	Location 1	Y	Hymenoptera	Pteromalidae		1
43819	16	4	2013	Location 1	Y	Hemiptera	Cicadellidae		4
12608	16	4	2013	Location 1	W	Diptera	Dolichopodidae		2
12608	16	4	2013	Location 1	W	Diptera	Drosophilidae		2
12608	16	4	2013	Location 1	W	Diptera	Phoridae		1
12608	16	4	2013	Location 1	W	Diptera	Sciaridae		3
12608	16	4	2013	Location 1	W	Diptera	Therevidae		1
12608	16	4	2013	Location 1	W	Hemiptera	Delphacidae		1
12608	16	4	2013	Location 1	W	Lepidoptera	Tineidae		1
	20	3	2013	Location 1	B	Diptera	Anthomyiidae		1
	20	3	2013	Location 1	B	Diptera	Tachinidae		1
	20	3	2013	Location 1	R	Coleoptera	Curculionidae		2
	20	3	2013	Location 1	Y	Diptera	Heleomyzidae		1
	20	3	2013	Location 1	Y	Diptera	Sarcophagidae		1
	20	3	2013	Location 1	Y	Diptera	Tachinidae		1
	20	3	2013	Location 1	Y	Hymenoptera	Braconidae		1
	20	3	2013	Location 1	Y	Hymenoptera	Eucoilidae		1
	20	3	2013	Location 1	Y	Coleoptera	Curculionidae		1
	2	4	2013	Location 1	B	Diptera	Anthomyiidae		2
	2	4	2013	Location 1	B	Diptera	Dolichopodidae		8
	2	4	2013	Location 1	B	Diptera	Cecidomyiidae		1
	2	4	2013	Location 1	B	Diptera	Chloropidae		1
	2	4	2013	Location 1	B	Diptera	Psychodidae		1
	2	4	2013	Location 1	B	Diptera	Sarcophagidae		2
	2	4	2013	Location 1	B	Diptera	Sciaridae		1
	2	4	2013	Location 1	R	Diptera	Cecidomyiidae		1
	2	4	2013	Location 1	R	Diptera	Chloropidae		1
	2	4	2013	Location 1	R	Diptera	Sciaridae		2
	2	4	2013	Location 1	R	Hemiptera	Delphacidae		1
	2	4	2013	Location 1	Y	Diptera	Dolichopodidae		2
	2	4	2013	Location 1	Y	Diptera	Heleomyzidae		1
	2	4	2013	Location 1	Y	Diptera	Psychodidae		1
	2	4	2013	Location 1	Y	Hymenoptera	Braconidae		1
	2	4	2013	Location 1	Y	Hymenoptera	Ichneumonidae		1
	2	4	2013	Location 1	Y	Hemiptera	Nabidae		1
	2	4	2013	Location 1	W	Diptera	Dolichopodidae		2
	2	4	2013	Location 1	W	Diptera	Phoridae		1
	2	4	2013	Location 1	W	Diptera	Sarcophagidae		2
	2	4	2013	Location 1	W	Diptera	Sciaridae		2
	3	5	2013	Location 1	B	Diptera	Dolichopodidae		4
	3	5	2013	Location 1	B	Diptera	Phoridae		1
	3	5	2013	Location 1	B	Hemiptera	Cicadellidae		1
	3	5	2013	Location 1	R	Diptera	Simuliidae		1
	3	5	2013	Location 1	Y	Diptera	Dolichopodidae		7
	3	5	2013	Location 1	Y	Diptera	Phoridae		7
	3	5	2013	Location 1	Y	Diptera	Sarcophagidae		1
	3	5	2013	Location 1	Y	Diptera	Sciaridae		1
	3	5	2013	Location 1	Y	Hymenoptera	Cynipidae		1
	3	5	2013	Location 1	Y	Hymenoptera	Formicidae		1
	3	5	2013	Location 1	Y	Hymenoptera	Ichneumonidae		1
	3	5	2013	Location 1	Y	Hemiptera	Cicadellidae		1
	3	5	2013	Location 1	W	Diptera	Dolichopodidae		5
	3	5	2013	Location 1	W	Diptera	Heleomyzidae		1
	3	5	2013	Location 1	W	Diptera	Phoridae		1
	3	5	2013	Location 1	W	Hymenoptera	Formicidae		2
	3	5	2013	Location 1	W	Hemiptera	Cicadellidae		2
	5	3	2013	Location 1	B	Diptera	Dolichopodidae		2
	5	3	2013	Location 1	B	Diptera	Sciaridae		1
	5	3	2013	Location 1	B	Hymenoptera	Diapriidae		1
	5	3	2013	Location 1	B	Hymenoptera	Eulophidae		1
	5	3	2013	Location 1	B	Hemiptera	Cicadellidae		3
	5	3	2013	Location 1	B	Hemiptera	Delphacidae		1
	5	3	2013	Location 1	R	Diptera	Anthomyiidae		1
	5	3	2013	Location 1	R	Diptera	Dolichopodidae		3
	5	3	2013	Location 1	R	Diptera	Cecidomyiidae		1
	5	3	2013	Location 1	R	Diptera	Muscidae		4
	5	3	2013	Location 1	R	Diptera	Phoridae		2
	5	3	2013	Location 1	R	Diptera	Sarcophagidae		1
	5	3	2013	Location 1	R	Diptera	Sciaridae		3
	5	3	2013	Location 1	R	Hymenoptera	Encyrtidae		1
	5	3	2013	Location 1	R	Hymenoptera	Formicidae		1
	5	3	2013	Location 1	R	Hemiptera	Cicadellidae		3
	5	3	2013	Location 1	Y	Diptera	Dolichopodidae		9
	5	3	2013	Location 1	Y	Diptera	Cecidomyiidae		1
	5	3	2013	Location 1	Y	Diptera	Heleomyzidae		1
	5	3	2013	Location 1	Y	Diptera	Muscidae		1
	5	3	2013	Location 1	Y	Diptera	Sarcophagidae		4
	5	3	2013	Location 1	Y	Diptera	Scathophagidae		1
	5	3	2013	Location 1	Y	Diptera	Sciaridae		1
	5	3	2013	Location 1	Y	Diptera	Tachinidae		1
	5	3	2013	Location 1	Y	Hymenoptera	Braconidae		6
	5	3	2013	Location 1	Y	Hymenoptera	Cynipidae		1
	5	3	2013	Location 1	Y	Hymenoptera	Encyrtidae		1
	5	3	2013	Location 1	Y	Hymenoptera	Formicidae		1
	5	3	2013	Location 1	Y	Hymenoptera	Pteromalidae		1
	5	3	2013	Location 1	Y	Hemiptera	Cicadellidae		4
	5	3	2013	Location 1	Y	Hemiptera	Delphacidae		5
	5	3	2013	Location 1	W	Diptera	Dolichopodidae		1
	5	3	2013	Location 1	W	Diptera	Sarcophagidae		2
	5	3	2013	Location 1	W	Diptera	Sciaridae		1
	16	5	2013	Location 1	B	Diptera	Dolichopodidae		2
	16	5	2013	Location 1	B	Diptera	Cecidomyiidae		4
	16	5	2013	Location 1	B	Diptera	Heleomyzidae		1
	16	5	2013	Location 1	B	Diptera	Sciaridae		1
	16	5	2013	Location 1	B	Hemiptera	Reduviidae		1
	16	5	2013	Location 1	B	Lepidoptera	Tineidae		2
	16	5	2013	Location 1	R	Diptera	Dolichopodidae		1
	16	5	2013	Location 1	R	Diptera	Cecidomyiidae		1
	16	5	2013	Location 1	R	Diptera	Sciaridae		2
	16	5	2013	Location 1	R	Hemiptera	Cicadellidae		1
	16	5	2013	Location 1	Y	Diptera	Dolichopodidae		8
	16	5	2013	Location 1	Y	Diptera	Bibionidae		2
	16	5	2013	Location 1	Y	Diptera	Cecidomyiidae		2
	16	5	2013	Location 1	Y	Diptera	Lauxaniidae		2
	16	5	2013	Location 1	Y	Diptera	Psychodidae		1
	16	5	2013	Location 1	Y	Diptera	Sciaridae		2
	16	5	2013	Location 1	Y	Hymenoptera	Platygastridae		1
	16	5	2013	Location 1	Y	Hymenoptera	Pteromalidae		2
	16	5	2013	Location 1	Y	Hemiptera	Cicadellidae		2
	16	5	2013	Location 1	Y	Hemiptera	Membracidae		1
	16	5	2013	Location 1	W	Diptera	Dolichopodidae		12
	16	5	2013	Location 1	W	Diptera	Bibionidae		1
	16	5	2013	Location 1	W	Diptera	Cecidomyiidae		2
	16	5	2013	Location 1	W	Diptera	Mycetophilidae		1
	16	5	2013	Location 1	W	Diptera	Phoridae		1
	16	5	2013	Location 1	W	Diptera	Psychodidae		1
	16	5	2013	Location 1	W	Diptera	Sarcophagidae		2
	16	5	2013	Location 1	W	Diptera	Sciaridae		5
	16	5	2013	Location 1	W	Diptera	Simuliidae		1
	16	5	2013	Location 1	W	Hymenoptera	Formicidae		3
	16	5	2013	Location 1	W	Hymenoptera	Halictidae		1
	16	5	2013	Location 1	W	Hemiptera	Anthocoridae		1
	16	5	2013	Location 1	W	Hemiptera	Cicadellidae		1
	16	5	2013	Location 1	W	Lepidoptera	Tineidae		2
	3	7	2013	Location 1	B	Diptera	Dolichopodidae		21
	3	7	2013	Location 1	B	Diptera	Drosophilidae		1
	3	7	2013	Location 1	B	Diptera	Phoridae		4
	3	7	2013	Location 1	B	Diptera	Scathophagidae		1
	3	7	2013	Location 1	B	Diptera	Sciaridae		5
	3	7	2013	Location 1	B	Hymenoptera	Formicidae		1
	3	7	2013	Location 1	B	Lepidoptera	Tineidae		1
	3	7	2013	Location 1	R	Diptera	Dolichopodidae		4
	3	7	2013	Location 1	R	Diptera	Chloropidae		1
	3	7	2013	Location 1	R	Diptera	Sciaridae		4
	3	7	2013	Location 1	R	Hymenoptera	Formicidae		1
	3	7	2013	Location 1	R	Lepidoptera	Tineidae		1
	3	7	2013	Location 1	Y	Diptera	Dolichopodidae		32
	3	7	2013	Location 1	Y	Diptera	Sarcophagidae		1
	3	7	2013	Location 1	Y	Diptera	Sepsidae		1
	3	7	2013	Location 1	Y	Hymenoptera	Braconidae		1
	3	7	2013	Location 1	Y	Hymenoptera	Formicidae		1
	3	7	2013	Location 1	Y	Hymenoptera	Ormyridae		1
	3	7	2013	Location 1	Y	Hemiptera	Cicadellidae		1
	3	7	2013	Location 1	W	Diptera	Dolichopodidae		35
	3	7	2013	Location 1	W	Diptera	Cecidomyiidae		2
	3	7	2013	Location 1	W	Diptera	Phoridae		1
	3	7	2013	Location 1	W	Diptera	Scathophagidae		1
	3	7	2013	Location 1	W	Diptera	Sciaridae		7
	3	7	2013	Location 1	W	Hymenoptera	Braconidae		1
	3	7	2013	Location 1	W	Hymenoptera	Formicidae		3
	3	7	2013	Location 1	W	Hemiptera	Cicadellidae		2
	3	7	2013	Location 1	W	Lepidoptera	Tineidae		1
	3	7	2013	Location 1	W	Coleoptera	Chrysomelidae		1
	3	7	2013	Location 1	W	Coleoptera	Tenebrionidae		1
	18	6	2013	Location 1	B	Diptera	Dolichopodidae		16
	18	6	2013	Location 1	B	Diptera	Drosophilidae		2
	18	6	2013	Location 1	B	Diptera	Cecidomyiidae		2
	18	6	2013	Location 1	B	Diptera	Empididae		2
	18	6	2013	Location 1	B	Diptera	Heleomyzidae		1
	18	6	2013	Location 1	B	Diptera	Muscidae		1
	18	6	2013	Location 1	B	Diptera	Phoridae		1
	18	6	2013	Location 1	B	Diptera	Sarcophagidae		1
	18	6	2013	Location 1	B	Diptera	Sciaridae		2
	18	6	2013	Location 1	B	Hymenoptera	Formicidae		2
	18	6	2013	Location 1	B	Hymenoptera	Halictidae		1
	18	6	2013	Location 1	B	Hemiptera	Cicadellidae		2
	18	6	2013	Location 1	R	Diptera	Cecidomyiidae		2
	18	6	2013	Location 1	R	Diptera	Phoridae		23
	18	6	2013	Location 1	R	Diptera	Sciaridae		1
	18	6	2013	Location 1	R	Hymenoptera	Formicidae		2
	18	6	2013	Location 1	R	Hemiptera	Cicadellidae		1
	18	6	2013	Location 1	Y	Diptera	Aulacigastridae		1
	18	6	2013	Location 1	Y	Diptera	Dolichopodidae		33
	18	6	2013	Location 1	Y	Diptera	Cecidomyiidae		3
	18	6	2013	Location 1	Y	Diptera	Chloropidae		2
	18	6	2013	Location 1	Y	Diptera	Ephydridae		1
	18	6	2013	Location 1	Y	Diptera	Heleomyzidae		1
	18	6	2013	Location 1	Y	Diptera	Lauxaniidae		1
	18	6	2013	Location 1	Y	Diptera	Phoridae		5
	18	6	2013	Location 1	Y	Diptera	Sarcophagidae		2
	18	6	2013	Location 1	Y	Diptera	Sciaridae		1
	18	6	2013	Location 1	Y	Hymenoptera	Braconidae		1
	18	6	2013	Location 1	Y	Hymenoptera	Crabronidae		1
	18	6	2013	Location 1	Y	Hymenoptera	Diapriidae		1
	18	6	2013	Location 1	Y	Hymenoptera	Formicidae		6
	18	6	2013	Location 1	Y	Hymenoptera	Ichneumonidae		1
	18	6	2013	Location 1	Y	Hymenoptera	Mymaridae		2
	18	6	2013	Location 1	Y	Hemiptera	Cicadellidae		3
	18	6	2013	Location 1	Y	Hemiptera	Miridae		1
	18	6	2013	Location 1	Y	Hemiptera	Psyllidae		1
	18	6	2013	Location 1	W	Diptera	Dolichopodidae		21
	18	6	2013	Location 1	W	Diptera	Empididae		1
	18	6	2013	Location 1	W	Diptera	Phoridae		2
	18	6	2013	Location 1	W	Diptera	Sarcophagidae		6
	18	6	2013	Location 1	W	Diptera	Sciaridae		1
	18	6	2013	Location 1	W	Hymenoptera	Formicidae		3
	18	6	2013	Location 1	W	Hymenoptera	Halictidae		1
	18	6	2013	Location 1	W	Hymenoptera	Pompilidae		1
	18	6	2013	Location 1	W	Hemiptera	Delphacidae		1
	18	6	2013	Location 1	W	Hemiptera	Miridae		1
	18	6	2013	Location 1	W	Coleoptera	Staphylinidae		1
	25	7	2013	Location 1	B	Diptera	Dolichopodidae		87
	25	7	2013	Location 1	B	Diptera	Drosophilidae		1
	25	7	2013	Location 1	B	Diptera	Cecidomyiidae		12
	25	7	2013	Location 1	B	Diptera	Lauxaniidae		1
	25	7	2013	Location 1	B	Diptera	Phoridae		7
	25	7	2013	Location 1	B	Diptera	Sarcophagidae		2
	25	7	2013	Location 1	B	Diptera	Sciaridae		3
	25	7	2013	Location 1	B	Hymenoptera	Formicidae		8
	25	7	2013	Location 1	B	Hymenoptera	Halictidae		1
	25	7	2013	Location 1	B	Hemiptera	Cicadellidae		6
	25	7	2013	Location 1	B	Lepidoptera	Tineidae		1
	25	7	2013	Location 1	B	Coleoptera	Ptinidae		1
	25	7	2013	Location 1	R	Diptera	Dolichopodidae		5
	25	7	2013	Location 1	R	Diptera	Cecidomyiidae		15
	25	7	2013	Location 1	R	Hymenoptera	Encyrtidae		1
	25	7	2013	Location 1	R	Hymenoptera	Formicidae		4
	25	7	2013	Location 1	R	Hemiptera	Delphacidae		1
	25	7	2013	Location 1	Y	Diptera	Agromyzidae		1
	25	7	2013	Location 1	Y	Diptera	Dolichopodidae		66
	25	7	2013	Location 1	Y	Diptera	Drosophilidae		1
	25	7	2013	Location 1	Y	Diptera	Cecidomyiidae		8
	25	7	2013	Location 1	Y	Diptera	Chironomidae		1
	25	7	2013	Location 1	Y	Diptera	Chloropidae		2
	25	7	2013	Location 1	Y	Diptera	Ephydridae		1
	25	7	2013	Location 1	Y	Diptera	Lauxaniidae		2
	25	7	2013	Location 1	Y	Diptera	Phoridae		7
	25	7	2013	Location 1	Y	Diptera	Sarcophagidae		2
	25	7	2013	Location 1	Y	Diptera	Sepsidae		6
	25	7	2013	Location 1	Y	Hymenoptera	Braconidae		4
	25	7	2013	Location 1	Y	Hymenoptera	Encyrtidae		4
	25	7	2013	Location 1	Y	Hymenoptera	Halictidae		1
	25	7	2013	Location 1	Y	Hymenoptera	Mymaridae		1
	25	7	2013	Location 1	Y	Hemiptera	Cicadellidae		10
	25	7	2013	Location 1	W	Diptera	Dolichopodidae		69
	25	7	2013	Location 1	W	Diptera	Cecidomyiidae		4
	25	7	2013	Location 1	W	Diptera	Chloropidae		1
	25	7	2013	Location 1	W	Diptera	Phoridae		9
	25	7	2013	Location 1	W	Diptera	Sarcophagidae		2
	25	7	2013	Location 1	W	Diptera	Sepsidae		1
	25	7	2013	Location 1	W	Hymenoptera	Formicidae		3
	25	7	2013	Location 1	W	Hymenoptera	Halictidae		3
	25	7	2013	Location 1	W	Hemiptera	Cicadellidae		2
	25	7	2013	Location 1	W	Hemiptera	Delphacidae		1
	20	8	2013	Location 1	B	Diptera	Agromyzidae		2
	20	8	2013	Location 1	B	Diptera	Dolichopodidae		25
	20	8	2013	Location 1	B	Diptera	Drosophilidae		2
	20	8	2013	Location 1	B	Diptera	Cecidomyiidae		2
	20	8	2013	Location 1	B	Diptera	Phoridae		3
	20	8	2013	Location 1	B	Diptera	Sarcophagidae		1
	20	8	2013	Location 1	B	Hymenoptera	Encyrtidae		2
	20	8	2013	Location 1	B	Hymenoptera	Halictidae		1
	20	8	2013	Location 1	B	Coleoptera	Staphylinidae		1
	20	8	2013	Location 1	R	Diptera	Dolichopodidae		6
	20	8	2013	Location 1	R	Diptera	Cecidomyiidae		7
	20	8	2013	Location 1	R	Diptera	Psychodidae		1
	20	8	2013	Location 1	R	Diptera	Sciaridae		1
	20	8	2013	Location 1	R	Hymenoptera	Formicidae		3
	20	8	2013	Location 1	R	Coleoptera	Chrysomelidae		1
	20	8	2013	Location 1	R	Coleoptera	Staphylinidae		1
	20	8	2013	Location 1	Y	Diptera	Dolichopodidae		73
	20	8	2013	Location 1	Y	Diptera	Cecidomyiidae		4
	20	8	2013	Location 1	Y	Diptera	Chironomidae		1
	20	8	2013	Location 1	Y	Diptera	Lauxaniidae		4
	20	8	2013	Location 1	Y	Diptera	Phoridae		4
	20	8	2013	Location 1	Y	Diptera	Sarcophagidae		3
	20	8	2013	Location 1	Y	Diptera	Sepsidae		2
	20	8	2013	Location 1	Y	Diptera	Therevidae		1
	20	8	2013	Location 1	Y	Hymenoptera	Aphelinidae		1
	20	8	2013	Location 1	Y	Hymenoptera	Diapriidae		1
	20	8	2013	Location 1	Y	Hymenoptera	Encyrtidae		1
	20	8	2013	Location 1	Y	Hymenoptera	Halictidae		1
	20	8	2013	Location 1	Y	Hymenoptera	Platygastridae		2
	20	8	2013	Location 1	Y	Hymenoptera	Pompilidae		1
	20	8	2013	Location 1	Y	Hymenoptera	Vespidae		1
	20	8	2013	Location 1	Y	Hemiptera	Cicadellidae		8
	20	8	2013	Location 1	Y	Hemiptera	Miridae		1
	20	8	2013	Location 1	W	Diptera	Agromyzidae		1
	20	8	2013	Location 1	W	Diptera	Dolichopodidae		119
	20	8	2013	Location 1	W	Diptera	Empididae		1
	20	8	2013	Location 1	W	Diptera	Lauxaniidae		1
	20	8	2013	Location 1	W	Diptera	Phoridae		2
	20	8	2013	Location 1	W	Diptera	Sarcophagidae		2
	20	8	2013	Location 1	W	Hymenoptera	Formicidae		3
	30	7	2013	Location 1	B	Diptera	Agromyzidae		1
	30	7	2013	Location 1	B	Diptera	Dolichopodidae		19
	30	7	2013	Location 1	B	Diptera	Calliphoridae		1
	30	7	2013	Location 1	B	Diptera	Cecidomyiidae		2
	30	7	2013	Location 1	B	Diptera	Phoridae		1
	30	7	2013	Location 1	B	Diptera	Scathophagidae		1
	30	7	2013	Location 1	B	Hymenoptera	Formicidae		2
	30	7	2013	Location 1	B	Hemiptera	Cicadellidae		5
	30	7	2013	Location 1	R	Diptera	Dolichopodidae		6
	30	7	2013	Location 1	R	Diptera	Cecidomyiidae		2
	30	7	2013	Location 1	R	Diptera	Chironomidae		1
	30	7	2013	Location 1	R	Diptera	Psychodidae		1
	30	7	2013	Location 1	R	Hymenoptera	Formicidae		1
	30	7	2013	Location 1	R	Hemiptera	Cicadellidae		6
	30	7	2013	Location 1	R	Hemiptera	Delphacidae		3
	30	7	2013	Location 1	Y	Diptera	Dolichopodidae		31
	30	7	2013	Location 1	Y	Diptera	Cecidomyiidae		1
	30	7	2013	Location 1	Y	Diptera	Chloropidae		3
	30	7	2013	Location 1	Y	Diptera	Heleomyzidae		1
	30	7	2013	Location 1	Y	Diptera	Muscidae		1
	30	7	2013	Location 1	Y	Diptera	Phoridae		2
	30	7	2013	Location 1	Y	Diptera	Sciaridae		1
	30	7	2013	Location 1	Y	Hymenoptera	Braconidae		1
	30	7	2013	Location 1	Y	Hymenoptera	Crabronidae		1
	30	7	2013	Location 1	Y	Hymenoptera	Formicidae		1
	30	7	2013	Location 1	Y	Hemiptera	Cicadellidae		2
	30	7	2013	Location 1	Y	Hemiptera	Miridae		1
	30	7	2013	Location 1	W	Diptera	Dolichopodidae		45
	30	7	2013	Location 1	W	Diptera	Lauxaniidae		2
	30	7	2013	Location 1	W	Diptera	Phoridae		1
	30	7	2013	Location 1	W	Diptera	Sarcophagidae		4
	30	7	2013	Location 1	W	Diptera	Scathophagidae		1
	30	7	2013	Location 1	W	Hymenoptera	Formicidae		1
	30	7	2013	Location 1	W	Hemiptera	Cicadellidae		5
	30	7	2013	Location 1	W	Hemiptera	Delphacidae		1
	30	7	2013	Location 1	W	Hemiptera	Miridae		1
	30	7	2013	Location 1	W	Coleoptera	Chrysomelidae		1
	3	9	2013	Location 1	B	Diptera	Dolichopodidae		57
	3	9	2013	Location 1	B	Diptera	Drosophilidae		2
	3	9	2013	Location 1	B	Diptera	Chloropidae		1
	3	9	2013	Location 1	B	Diptera	Ephydridae		1
	3	9	2013	Location 1	B	Diptera	Lauxaniidae		2
	3	9	2013	Location 1	B	Diptera	Phoridae		4
	3	9	2013	Location 1	B	Diptera	Sarcophagidae		1
	3	9	2013	Location 1	B	Diptera	Sciaridae		2
	3	9	2013	Location 1	B	Hymenoptera	Encyrtidae		2
	3	9	2013	Location 1	B	Hymenoptera	Formicidae		10
	3	9	2013	Location 1	B	Hemiptera	Cicadellidae		5
	3	9	2013	Location 1	B	Hemiptera	Delphacidae		2
	3	9	2013	Location 1	R	Diptera	Dolichopodidae		13
	3	9	2013	Location 1	R	Diptera	Cecidomyiidae		4
	3	9	2013	Location 1	R	Diptera	Phoridae		6
	3	9	2013	Location 1	R	Hymenoptera	Encyrtidae		1
	3	9	2013	Location 1	R	Hymenoptera	Formicidae		10
	3	9	2013	Location 1	R	Hemiptera	Cicadellidae		1
	3	9	2013	Location 1	R	Hemiptera	Delphacidae		2
	3	9	2013	Location 1	R	Lepidoptera	Tineidae		1
	3	9	2013	Location 1	Y	Diptera	Agromyzidae		3
	3	9	2013	Location 1	Y	Diptera	Dolichopodidae		141
	3	9	2013	Location 1	Y	Diptera	Cecidomyiidae		14
	3	9	2013	Location 1	Y	Diptera	Chloropidae		3
	3	9	2013	Location 1	Y	Diptera	Ephydridae		3
	3	9	2013	Location 1	Y	Diptera	Lauxaniidae		3
	3	9	2013	Location 1	Y	Diptera	Muscidae		1
	3	9	2013	Location 1	Y	Diptera	Phoridae		7
	3	9	2013	Location 1	Y	Diptera	Sarcophagidae		10
	3	9	2013	Location 1	Y	Diptera	Scathophagidae		1
	3	9	2013	Location 1	Y	Diptera	Sciaridae		2
	3	9	2013	Location 1	Y	Diptera	Sepsidae		8
	3	9	2013	Location 1	Y	Hymenoptera	Ceraphronidae		1
	3	9	2013	Location 1	Y	Hymenoptera	Elasmidae		1
	3	9	2013	Location 1	Y	Hymenoptera	Encyrtidae		5
	3	9	2013	Location 1	Y	Hymenoptera	Formicidae		7
	3	9	2013	Location 1	Y	Hymenoptera	Ichneumonidae		1
	3	9	2013	Location 1	Y	Hymenoptera	Platygastridae		3
	3	9	2013	Location 1	Y	Hemiptera	Cercopidae		1
	3	9	2013	Location 1	Y	Hemiptera	Cicadellidae		6
	3	9	2013	Location 1	Y	Hemiptera	Delphacidae		4
	3	9	2013	Location 1	Y	Hemiptera	Membracidae		1
	3	9	2013	Location 1	W	Diptera	Dolichopodidae		124
	3	9	2013	Location 1	W	Diptera	Drosophilidae		1
	3	9	2013	Location 1	W	Diptera	Cecidomyiidae		1
	3	9	2013	Location 1	W	Diptera	Chloropidae		1
	3	9	2013	Location 1	W	Diptera	Lauxaniidae		2
	3	9	2013	Location 1	W	Diptera	Phoridae		3
	3	9	2013	Location 1	W	Diptera	Sarcophagidae		6
	3	9	2013	Location 1	W	Hymenoptera	Encyrtidae		1
	3	9	2013	Location 1	W	Hymenoptera	Formicidae		7
	3	9	2013	Location 1	W	Hemiptera	Cicadellidae		3
	3	9	2013	Location 1	W	Hemiptera	Delphacidae		2
	18	9	2013	Location 1	B	Diptera	Dolichopodidae		32
	18	9	2013	Location 1	B	Diptera	Cecidomyiidae		2
	18	9	2013	Location 1	B	Diptera	Chloropidae		3
	18	9	2013	Location 1	B	Diptera	Phoridae		1
	18	9	2013	Location 1	B	Diptera	Sciaridae		1
	18	9	2013	Location 1	B	Hymenoptera	Braconidae		1
	18	9	2013	Location 1	B	Hymenoptera	Encyrtidae		2
	18	9	2013	Location 1	B	Hymenoptera	Formicidae		52
	18	9	2013	Location 1	B	Hemiptera	Delphacidae		2
	18	9	2013	Location 1	B	Lepidoptera	Tineidae		1
	18	9	2013	Location 1	R	Diptera	Dolichopodidae		9
	18	9	2013	Location 1	R	Diptera	Cecidomyiidae		17
	18	9	2013	Location 1	R	Diptera	Ceratopogonidae		1
	18	9	2013	Location 1	R	Diptera	Phoridae		1
	18	9	2013	Location 1	R	Hymenoptera	Formicidae		6
	18	9	2013	Location 1	R	Hemiptera	Cicadellidae		2
	18	9	2013	Location 1	R	Hemiptera	Delphacidae		1
	18	9	2013	Location 1	R	Lepidoptera	Tineidae		1
	18	9	2013	Location 1	Y	Diptera	Agromyzidae		3
	18	9	2013	Location 1	Y	Diptera	Dolichopodidae		103
	18	9	2013	Location 1	Y	Diptera	Bibionidae		2
	18	9	2013	Location 1	Y	Diptera	Cecidomyiidae		12
	18	9	2013	Location 1	Y	Diptera	Chloropidae		3
	18	9	2013	Location 1	Y	Diptera	Phoridae		3
	18	9	2013	Location 1	Y	Diptera	Sarcophagidae		6
	18	9	2013	Location 1	Y	Diptera	Sciaridae		2
	18	9	2013	Location 1	Y	Hymenoptera	Dryinidae		1
	18	9	2013	Location 1	Y	Hymenoptera	Encyrtidae		1
	18	9	2013	Location 1	Y	Hymenoptera	Formicidae		5
	18	9	2013	Location 1	Y	Hymenoptera	Platygastridae		1
	18	9	2013	Location 1	Y	Hymenoptera	Pompilidae		1
	18	9	2013	Location 1	Y	Hymenoptera	Vespidae		4
	18	9	2013	Location 1	Y	Hemiptera	Cicadellidae		10
	18	9	2013	Location 1	Y	Lepidoptera	Tineidae		1
	18	9	2013	Location 1	W	Diptera	Dolichopodidae		60
	18	9	2013	Location 1	W	Diptera	Bibionidae		3
	18	9	2013	Location 1	W	Diptera	Cecidomyiidae		3
	18	9	2013	Location 1	W	Diptera	Chloropidae		1
	18	9	2013	Location 1	W	Diptera	Phoridae		7
	18	9	2013	Location 1	W	Diptera	Sarcophagidae		5
	18	9	2013	Location 1	W	Diptera	Scathophagidae		1
	18	9	2013	Location 1	W	Diptera	Sciaridae		2
	18	9	2013	Location 1	W	Hymenoptera	Braconidae		3
	18	9	2013	Location 1	W	Hymenoptera	Formicidae		2
	18	9	2013	Location 1	W	Hemiptera	Cicadellidae		1
	18	9	2013	Location 1	W	Hemiptera	Delphacidae		1
	15	10	2013	Location 1	B	Diptera	Dolichopodidae		13
	15	10	2013	Location 1	B	Diptera	Drosophilidae		2
	15	10	2013	Location 1	B	Diptera	Cecidomyiidae		3
	15	10	2013	Location 1	B	Diptera	Heleomyzidae		1
	15	10	2013	Location 1	B	Diptera	Phoridae		1
	15	10	2013	Location 1	B	Diptera	Psychodidae		1
	15	10	2013	Location 1	B	Diptera	Scathophagidae		1
	15	10	2013	Location 1	B	Diptera	Sciaridae		1
	15	10	2013	Location 1	B	Hymenoptera	Formicidae		6
	15	10	2013	Location 1	B	Hemiptera	Cicadellidae		2
	15	10	2013	Location 1	R	Diptera	Dolichopodidae		4
	15	10	2013	Location 1	R	Diptera	Phoridae		1
	15	10	2013	Location 1	R	Diptera	Sciaridae		1
	15	10	2013	Location 1	R	Hymenoptera	Encyrtidae		2
	15	10	2013	Location 1	R	Hymenoptera	Formicidae		2
	15	10	2013	Location 1	R	Hemiptera	Cicadellidae		5
	15	10	2013	Location 1	Y	Diptera	Dolichopodidae		55
	15	10	2013	Location 1	Y	Diptera	Cecidomyiidae		3
	15	10	2013	Location 1	Y	Diptera	Chloropidae		2
	15	10	2013	Location 1	Y	Diptera	Ephydridae		1
	15	10	2013	Location 1	Y	Diptera	Heleomyzidae		1
	15	10	2013	Location 1	Y	Diptera	Lauxaniidae		2
	15	10	2013	Location 1	Y	Diptera	Phoridae		1
	15	10	2013	Location 1	Y	Diptera	Sepsidae		14
	15	10	2013	Location 1	Y	Hymenoptera	Braconidae		6
	15	10	2013	Location 1	Y	Hymenoptera	Dryinidae		1
	15	10	2013	Location 1	Y	Hymenoptera	Formicidae		5
	15	10	2013	Location 1	Y	Hemiptera	Cicadellidae		8
	15	10	2013	Location 1	W	Diptera	Dolichopodidae		35
	15	10	2013	Location 1	W	Diptera	Drosophilidae		3
	15	10	2013	Location 1	W	Diptera	Cecidomyiidae		1
	15	10	2013	Location 1	W	Diptera	Heleomyzidae		3
	15	10	2013	Location 1	W	Diptera	Phoridae		2
	15	10	2013	Location 1	W	Diptera	Sarcophagidae		3
	15	10	2013	Location 1	W	Diptera	Sciaridae		1
	15	10	2013	Location 1	W	Diptera	Tachinidae		1
	15	10	2013	Location 1	W	Hymenoptera	Eulophidae		1
	15	10	2013	Location 1	W	Hymenoptera	Formicidae		4
	15	10	2013	Location 1	W	Hemiptera	Cicadellidae		9
	1	10	2013	Location 1	B	Diptera	Agromyzidae		1
	1	10	2013	Location 1	B	Diptera	Dolichopodidae		16
	1	10	2013	Location 1	B	Diptera	Drosophilidae		2
	1	10	2013	Location 1	B	Diptera	Cecidomyiidae		12
	1	10	2013	Location 1	B	Diptera	Phoridae		1
	1	10	2013	Location 1	B	Diptera	Sarcophagidae		2
	1	10	2013	Location 1	B	Diptera	Scathophagidae		3
	1	10	2013	Location 1	B	Hymenoptera	Encyrtidae		1
	1	10	2013	Location 1	B	Hymenoptera	Formicidae		4
	1	10	2013	Location 1	B	Hymenoptera	Halictidae		1
	1	10	2013	Location 1	B	Hemiptera	Cicadellidae		6
	1	10	2013	Location 1	B	Hemiptera	Delphacidae		3
	1	10	2013	Location 1	B	Coleoptera	Ptiliidae		1
	1	10	2013	Location 1	B	Coleoptera	Staphylinidae		1
	1	10	2013	Location 1	R	Diptera	Dolichopodidae		4
	1	10	2013	Location 1	R	Diptera	Cecidomyiidae		5
	1	10	2013	Location 1	R	Diptera	Ceratopogonidae		1
	1	10	2013	Location 1	R	Hymenoptera	Formicidae		3
	1	10	2013	Location 1	R	Hemiptera	Cicadellidae		6
	1	10	2013	Location 1	Y	Diptera	Dolichopodidae		53
	1	10	2013	Location 1	Y	Diptera	Cecidomyiidae		8
	1	10	2013	Location 1	Y	Diptera	Chloropidae		1
	1	10	2013	Location 1	Y	Diptera	Ephydridae		2
	1	10	2013	Location 1	Y	Diptera	Lauxaniidae		1
	1	10	2013	Location 1	Y	Diptera	Phoridae		1
	1	10	2013	Location 1	Y	Diptera	Psychodidae		1
	1	10	2013	Location 1	Y	Diptera	Sarcophagidae		3
	1	10	2013	Location 1	Y	Diptera	Sepsidae		2
	1	10	2013	Location 1	Y	Hymenoptera	Braconidae		1
	1	10	2013	Location 1	Y	Hymenoptera	Encyrtidae		1
	1	10	2013	Location 1	Y	Hymenoptera	Formicidae		4
	1	10	2013	Location 1	Y	Hymenoptera	Halictidae		1
	1	10	2013	Location 1	Y	Hymenoptera	Ichneumonidae		1
	1	10	2013	Location 1	Y	Hymenoptera	Platygastridae		1
	1	10	2013	Location 1	Y	Hemiptera	Cicadellidae		10
	1	10	2013	Location 1	Y	Coleoptera	Staphylinidae		1
	1	10	2013	Location 1	W	Diptera	Dolichopodidae		13
	1	10	2013	Location 1	W	Diptera	Drosophilidae		1
	1	10	2013	Location 1	W	Diptera	Cecidomyiidae		1
	1	10	2013	Location 1	W	Diptera	Phoridae		1
	1	10	2013	Location 1	W	Diptera	Psychodidae		1
	1	10	2013	Location 1	W	Diptera	Sarcophagidae		1
	1	10	2013	Location 1	W	Diptera	Sciaridae		1
	1	10	2013	Location 1	W	Hemiptera	Cicadellidae		3
	4	11	2013	Location 1	B	Diptera	Dolichopodidae		11
	4	11	2013	Location 1	B	Diptera	Drosophilidae		2
	4	11	2013	Location 1	B	Diptera	Calliphoridae		1
	4	11	2013	Location 1	B	Diptera	Muscidae		1
	4	11	2013	Location 1	B	Diptera	Phoridae		3
	4	11	2013	Location 1	B	Diptera	Psychodidae		1
	4	11	2013	Location 1	B	Diptera	Scathophagidae		1
	4	11	2013	Location 1	B	Diptera	Sciaridae		1
	4	11	2013	Location 1	B	Hymenoptera	Encyrtidae		1
	4	11	2013	Location 1	B	Hymenoptera	Formicidae		1
	4	11	2013	Location 1	B	Hymenoptera	Ichneumonidae		1
	4	11	2013	Location 1	B	Hemiptera	Cicadellidae		7
	4	11	2013	Location 1	B	Hemiptera	Delphacidae		1
	4	11	2013	Location 1	B	Coleoptera	Staphylinidae		1
	4	11	2013	Location 1	R	Diptera	Ceratopogonidae		1
	4	11	2013	Location 1	R	Diptera	Psychodidae		1
	4	11	2013	Location 1	R	Hymenoptera	Formicidae		1
	4	11	2013	Location 1	R	Hemiptera	Cicadellidae		1
	4	11	2013	Location 1	R	Hemiptera	Cixiidae		1
	4	11	2013	Location 1	R	Hemiptera	Delphacidae		3
	4	11	2013	Location 1	R	Coleoptera	Chrysomelidae		1
	4	11	2013	Location 1	Y	Diptera	Dolichopodidae		8
	4	11	2013	Location 1	Y	Diptera	Chloropidae		2
	4	11	2013	Location 1	Y	Diptera	Muscidae		1
	4	11	2013	Location 1	Y	Diptera	Sarcophagidae		3
	4	11	2013	Location 1	Y	Hymenoptera	Braconidae		1
	4	11	2013	Location 1	Y	Hymenoptera	Eucoilidae		1
	4	11	2013	Location 1	Y	Hymenoptera	Eulophidae		1
	4	11	2013	Location 1	Y	Hymenoptera	Formicidae		4
	4	11	2013	Location 1	Y	Hymenoptera	Halictidae		2
	4	11	2013	Location 1	Y	Hymenoptera	Tiphiidae		1
	4	11	2013	Location 1	Y	Hemiptera	Cicadellidae		8
	4	11	2013	Location 1	W	Diptera	Dolichopodidae		6
	4	11	2013	Location 1	W	Diptera	Drosophilidae		3
	4	11	2013	Location 1	W	Diptera	Sarcophagidae		1
	4	11	2013	Location 1	W	Diptera	Scathophagidae		1
	4	11	2013	Location 1	W	Hymenoptera	Platygastridae		1
	4	11	2013	Location 1	W	Hemiptera	Cicadellidae		2
	4	11	2013	Location 1	W	Lepidoptera	Tineidae		1
	18	11	2013	Location 1	B	Diptera	Dolichopodidae		3
	18	11	2013	Location 1	B	Diptera	Drosophilidae		4
	18	11	2013	Location 1	B	Diptera	Cecidomyiidae		1
	18	11	2013	Location 1	B	Diptera	Phoridae		2
	18	11	2013	Location 1	B	Diptera	Sarcophagidae		3
	18	11	2013	Location 1	B	Diptera	Scathophagidae		1
	18	11	2013	Location 1	B	Hymenoptera	Eulophidae		1
	18	11	2013	Location 1	B	Hymenoptera	Formicidae		4
	18	11	2013	Location 1	B	Hymenoptera	Platygastridae		1
	18	11	2013	Location 1	B	Hymenoptera	Torymidae		1
	18	11	2013	Location 1	B	Hemiptera	Cicadellidae		4
	18	11	2013	Location 1	R	Diptera	Cecidomyiidae		3
	18	11	2013	Location 1	R	Diptera	Phoridae		1
	18	11	2013	Location 1	R	Hemiptera	Cicadellidae		3
	18	11	2013	Location 1	Y	Diptera	Agromyzidae		1
	18	11	2013	Location 1	Y	Diptera	Dolichopodidae		1
	18	11	2013	Location 1	Y	Diptera	Ephydridae		1
	18	11	2013	Location 1	Y	Diptera	Lauxaniidae		1
	18	11	2013	Location 1	Y	Diptera	Phoridae		4
	18	11	2013	Location 1	Y	Diptera	Sarcophagidae		1
	18	11	2013	Location 1	Y	Diptera	Sciaridae		1
	18	11	2013	Location 1	Y	Diptera	Tachinidae		1
	18	11	2013	Location 1	Y	Hymenoptera	Encyrtidae		1
	18	11	2013	Location 1	Y	Hymenoptera	Eucoilidae		1
	18	11	2013	Location 1	Y	Hymenoptera	Formicidae		2
	18	11	2013	Location 1	Y	Hymenoptera	Torymidae		1
	18	11	2013	Location 1	W	Diptera	Dolichopodidae		5
	18	11	2013	Location 1	W	Diptera	Calliphoridae		1
	18	11	2013	Location 1	W	Diptera	Cecidomyiidae		1
	18	11	2013	Location 1	W	Diptera	Muscidae		1
	18	11	2013	Location 1	W	Diptera	Phoridae		1
	18	11	2013	Location 1	W	Diptera	Sarcophagidae		2
	18	11	2013	Location 1	W	Hymenoptera	Ceraphronidae		1
	18	11	2013	Location 1	W	Hymenoptera	Formicidae		1
	18	11	2013	Location 1	W	Hemiptera	Cicadellidae		2
	18	11	2013	Location 1	W	Hemiptera	Oxycarenidae		1
	9	12	2013	Location 1	B	Diptera	Drosophilidae		2
	9	12	2013	Location 1	B	Hemiptera	Delphacidae		2
	9	12	2013	Location 1	B	Coleoptera	Chrysomelidae		2
	9	12	2013	Location 1	R	Diptera	Drosophilidae		1
	9	12	2013	Location 1	R	Diptera	Sciaridae		1
	9	12	2013	Location 1	R	Hemiptera	Cicadellidae		2
	9	12	2013	Location 1	R	Hemiptera	Delphacidae		1
	9	12	2013	Location 1	Y	Diptera	Dolichopodidae		1
	9	12	2013	Location 1	Y	Diptera	Drosophilidae		2
	9	12	2013	Location 1	Y	Diptera	Chloropidae		2
	9	12	2013	Location 1	Y	Diptera	Phoridae		2
	9	12	2013	Location 1	Y	Diptera	Platypezidae		1
	9	12	2013	Location 1	Y	Diptera	Sciaridae		1
	9	12	2013	Location 1	Y	Hymenoptera	Braconidae		2
	9	12	2013	Location 1	Y	Hymenoptera	Encyrtidae		2
	9	12	2013	Location 1	Y	Hymenoptera	Formicidae		2
	9	12	2013	Location 1	Y	Hemiptera	Cicadellidae		3
	9	12	2013	Location 1	Y	Hemiptera	Delphacidae		1
	9	12	2013	Location 1	W	Diptera	Dolichopodidae		2
	9	12	2013	Location 1	W	Diptera	Chloropidae		2
	9	12	2013	Location 1	W	Diptera	Phoridae		1
	9	12	2013	Location 1	W	Diptera	Scathophagidae		1
	9	12	2013	Location 1	W	Diptera	Sciaridae		1
	9	12	2013	Location 1	W	Hymenoptera	Formicidae		2
	9	12	2013	Location 1	W	Hemiptera	Cicadellidae		3
	9	12	2013	Location 1	W	Coleoptera	Chrysomelidae		1
58748	8	4	2014	Location 1	B	Diptera	Dolichopodidae	1	1
58748	8	4	2014	Location 1	B	Diptera	Dolichopodidae	2	2
58748	8	4	2014	Location 1	B	Diptera	Dolichopodidae	3	3
58748	8	4	2014	Location 1	B	Diptera	Mycetophilidae	1	1
58748	8	4	2014	Location 1	B	Diptera	Sarcophagidae	1	1
58748	8	4	2014	Location 1	B	Hemiptera	Cicadellidae	1	1
92573	8	4	2014	Location 1	R	Diptera	Chironomidae	1	1
92573	8	4	2014	Location 1	R	Diptera	Sciaridae	1	1
484	8	4	2014	Location 1	Y	Diptera	Dolichopodidae	1	1
484	8	4	2014	Location 1	Y	Diptera	Dolichopodidae	2	1
484	8	4	2014	Location 1	Y	Diptera	Chloropidae	1	1
484	8	4	2014	Location 1	Y	Diptera	Lauxaniidae	1	1
484	8	4	2014	Location 1	Y	Diptera	Phoridae	1	1
484	8	4	2014	Location 1	Y	Diptera	Scathophagidae	1	1
484	8	4	2014	Location 1	Y	Hymenoptera	Cynipidae	1	1
484	8	4	2014	Location 1	Y	Hymenoptera	Cicadellidae	1	1
484	8	4	2014	Location 1	Y	Hemiptera	Delphacidae	1	1
61807	8	4	2014	Location 1	W	Diptera	Dolichopodidae	1	1
61807	8	4	2014	Location 1	W	Diptera	Dolichopodidae	2	1
61807	8	4	2014	Location 1	W	Diptera	Dolichopodidae	3	1
61807	8	4	2014	Location 1	W	Diptera	Phoridae	1	2
61807	8	4	2014	Location 1	W	Hymenoptera	Cynipidae	1	1
49818	11	3	2014	Location 1	B	Diptera	Anthomyiidae	1	1
49818	11	3	2014	Location 1	B	Diptera	Muscidae	1	1
49818	11	3	2014	Location 1	B	Diptera	Psychodidae	1	6
49818	11	3	2014	Location 1	B	Diptera	Sarcophagidae	1	1
49818	11	3	2014	Location 1	B	Diptera	Sciaridae	1	4
49818	11	3	2014	Location 1	B	Hymenoptera	Formicidae	1	1
49818	11	3	2014	Location 1	B	Hemiptera	Cicadellidae	1	2
76758	11	3	2014	Location 1	R	Diptera	Chironomidae	1	1
76758	11	3	2014	Location 1	R	Diptera	Phoridae	1	1
76758	11	3	2014	Location 1	R	Diptera	Sciaridae	1	3
76758	11	3	2014	Location 1	R	Hymenoptera	Formicidae	1	1
76758	11	3	2014	Location 1	R	Hymenoptera	Formicidae	2	1
76758	11	3	2014	Location 1	R	Hemiptera	Cicadellidae	1	1
76758	11	3	2014	Location 1	R	Hemiptera	Cicadellidae	2	3
76758	11	3	2014	Location 1	R	Coleoptera	Chrysomelidae	1	1
98177	11	3	2014	Location 1	Y	Diptera	Dolichopodidae	1	2
98177	11	3	2014	Location 1	Y	Diptera	Dolichopodidae	2	2
98177	11	3	2014	Location 1	Y	Diptera	Dolichopodidae	3	1
98177	11	3	2014	Location 1	Y	Diptera	Dolichopodidae	4	1
98177	11	3	2014	Location 1	Y	Diptera	Chloropidae	1	2
98177	11	3	2014	Location 1	Y	Diptera	Drosophilidae	1	1
98177	11	3	2014	Location 1	Y	Diptera	Calliphoridae	1	1
98177	11	3	2014	Location 1	Y	Diptera	Muscidae	1	1
98177	11	3	2014	Location 1	Y	Diptera	Phoridae	1	1
98177	11	3	2014	Location 1	Y	Diptera	Phoridae	2	1
98177	11	3	2014	Location 1	Y	Diptera	Sciaridae	1	5
98177	11	3	2014	Location 1	Y	Hymenoptera	Braconidae	1	1
98177	11	3	2014	Location 1	Y	Hymenoptera	Ceratopogonidae	1	1
98177	11	3	2014	Location 1	Y	Hymenoptera	Halictidae	1	1
98177	11	3	2014	Location 1	Y	Hymenoptera	Vespidae	1	1
98177	11	3	2014	Location 1	Y	Hemiptera	Cicadellidae	1	1
98177	11	3	2014	Location 1	Y	Hemiptera	Cicadellidae	2	1
98177	11	3	2014	Location 1	Y	Lepidoptera	Tineidae	1	1
79154	11	3	2014	Location 1	W	Diptera	Dolichopodidae	1	2
79154	11	3	2014	Location 1	W	Diptera	Psychodidae	1	1
79154	11	3	2014	Location 1	W	Diptera	Muscidae	1	1
79154	11	3	2014	Location 1	W	Diptera	Sarcophagidae	1	2
79154	11	3	2014	Location 1	W	Diptera	Sarcophagidae	2	2
79154	11	3	2014	Location 1	W	Diptera	Sarcophagidae	3	1
79154	11	3	2014	Location 1	W	Diptera	Scathophagidae	1	1
79154	11	3	2014	Location 1	W	Diptera	Sciaridae	1	4
79154	11	3	2014	Location 1	W	Hymenoptera	Braconidae	1	1
79154	11	3	2014	Location 1	W	Hymenoptera	Platygastridae	1	1
79154	11	3	2014	Location 1	W	Hemiptera	Cicadellidae	1	1
79154	11	3	2014	Location 1	W	Hemiptera	Cicadellidae	2	3
79154	11	3	2014	Location 1	W	Hemiptera	Delphacidae	1	1
79154	11	3	2014	Location 1	W	Coleoptera	Coccinellidae	1	1
46397	25	3	2014	Location 1	B	Diptera	Ceratopogonidae	1	1
46397	25	3	2014	Location 1	B	Diptera	Sciaridae	1	1
33029	25	3	2014	Location 1	R	no data	no data
6787	25	3	2014	Location 1	Y	Diptera	Dolichopodidae	1	1
6787	25	3	2014	Location 1	Y	Diptera	Dolichopodidae	2	1
6787	25	3	2014	Location 1	Y	Diptera	Dolichopodidae	3	1
6787	25	3	2014	Location 1	Y	Diptera	Calliphoridae	1	3
6787	25	3	2014	Location 1	Y	Diptera	Phoridae	1	2
6787	25	3	2014	Location 1	Y	Diptera	Phoridae	2	3
6787	25	3	2014	Location 1	Y	Diptera	Sarcophagidae	1	1
6787	25	3	2014	Location 1	Y	Hymenoptera	Platygastridae	1	1
21630	25	3	2014	Location 1	W	Diptera	Muscidae	1	1
21630	25	3	2014	Location 1	W	Diptera	Phoridae	1	1
21630	25	3	2014	Location 1	W	Diptera	Phoridae	2	1
21630	25	3	2014	Location 1	W	Diptera	Sarcophagidae	1	1
21630	25	3	2014	Location 1	W	Diptera	Sciaridae	1	1
21630	25	3	2014	Location 1	W	Diptera	Tachinidae	1	1
21630	25	3	2014	Location 1	W	Hymenoptera	Braconidae	1	1
82804	15	10	2014	Location 1	B	Diptera	Dolichopodidae	1	1
82804	15	10	2014	Location 1	B	Diptera	Dolichopodidae	2	1
82804	15	10	2014	Location 1	B	Diptera	Dolichopodidae	3	2
82804	15	10	2014	Location 1	B	Diptera	Dolichopodidae	4	15
82804	15	10	2014	Location 1	B	Diptera	Phoridae	1	1
82804	15	10	2014	Location 1	B	Diptera	Sciaridae	1	1
82804	15	10	2014	Location 1	B	Diptera	Drosophilidae	1	1
82804	15	10	2014	Location 1	B	Diptera	Sarcophagidae	1	1
82804	15	10	2014	Location 1	B	Diptera	Chloropidae	1	1
82804	15	10	2014	Location 1	B	Hymenoptera	Crabronidae	1	1
82804	15	10	2014	Location 1	B	Hemiptera	Cicadellidae	1	1
82804	15	10	2014	Location 1	B	Hemiptera	Cicadellidae	2	1
82804	15	10	2014	Location 1	B	Hemiptera	Cercopidae	1	1
82804	15	10	2014	Location 1	B	Coleptera	Chrysomelidae	1	1
6922	15	10	2014	Location 1	R	Diptera	Cecidomyiidae	1	3
6922	15	10	2014	Location 1	R	Hymenoptera	Formicidae	1	1
6922	15	10	2014	Location 1	R	Hemiptera	Cicadellidae	1	1
5843	15	10	2014	Location 1	Y	Diptera	Dolichopodidae	1	1
5843	15	10	2014	Location 1	Y	Diptera	Dolichopodidae	2	1
5843	15	10	2014	Location 1	Y	Diptera	Dolichopodidae	3	2
5843	15	10	2014	Location 1	Y	Diptera	Dolichopodidae	4	3
5843	15	10	2014	Location 1	Y	Diptera	Dolichopodidae	5	15
5843	15	10	2014	Location 1	Y	Diptera	Dolichopodidae	6	11
5843	15	10	2014	Location 1	Y	Diptera	Sarcophagidae	1	1
5843	15	10	2014	Location 1	Y	Diptera	Sarcophagidae	2	1
5843	15	10	2014	Location 1	Y	Diptera	Lauxaniidae	1	2
5843	15	10	2014	Location 1	Y	Diptera	Chloropidae	1	3
5843	15	10	2014	Location 1	Y	Diptera	Agromyzidae	1	1
5843	15	10	2014	Location 1	Y	Diptera	Cecidomyiidae	1	2
5843	15	10	2014	Location 1	Y	Diptera	Sciaridae	1	2
5843	15	10	2014	Location 1	Y	Diptera	Phoridae	1	1
5843	15	10	2014	Location 1	Y	Diptera	Phoridae	2	2
5843	15	10	2014	Location 1	Y	Hymenoptera	Encyrtidae	1	1
5843	15	10	2014	Location 1	Y	Hymenoptera	Encyrtidae	2	2
5843	15	10	2014	Location 1	Y	Hymenoptera	Ceraphronidae	1	2
5843	15	10	2014	Location 1	Y	Hymenoptera	Mymaridae	1	1
5843	15	10	2014	Location 1	Y	Hymenoptera	Formicidae	1	1
5843	15	10	2014	Location 1	Y	Hymenoptera	Halictidae	1	1
5843	15	10	2014	Location 1	Y	Hemiptera	Cicadellidae	1	1
5843	15	10	2014	Location 1	Y	Hemiptera	Cicadellidae	2	1
5843	15	10	2014	Location 1	Y	Hemiptera	Delphacidae	1	1
5843	15	10	2014	Location 1	Y	Hemiptera	Delphacidae	2	1
5843	15	10	2014	Location 1	Y	Lepidoptera	Pyralidae	1	1
43655	15	10	2014	Location 1	W	Diptera	Dolichopodidae	1	1
43655	15	10	2014	Location 1	W	Diptera	Dolichopodidae	2	1
43655	15	10	2014	Location 1	W	Diptera	Dolichopodidae	3	1
43655	15	10	2014	Location 1	W	Diptera	Dolichopodidae	4	2
43655	15	10	2014	Location 1	W	Diptera	Dolichopodidae	5	2
43655	15	10	2014	Location 1	W	Diptera	Dolichopodidae	6	49
43655	15	10	2014	Location 1	W	Diptera	Sarcophagidae	1	6
43655	15	10	2014	Location 1	W	Diptera	Phoridae	1	1
43655	15	10	2014	Location 1	W	Diptera	Phoridae	2	7
43655	15	10	2014	Location 1	W	Diptera	Lauxaniidae	1	1
43655	15	10	2014	Location 1	W	Diptera	Ephydridae	1	1
43655	15	10	2014	Location 1	W	Diptera	Ephydridae	2	1
43655	15	10	2014	Location 1	W	Diptera	Muscidae	1	1
43655	15	10	2014	Location 1	W	Diptera	Sciaridae	1	1
43655	15	10	2014	Location 1	W	Diptera	Cecidomyiidae	1	1
43655	15	10	2014	Location 1	W	Diptera	Cecidomyiidae	2	2
43655	15	10	2014	Location 1	W	Hymenoptera	Formicidae	1	1
43655	15	10	2014	Location 1	W	Hymenoptera	Formicidae	2	1
43655	15	10	2014	Location 1	W	Lepidoptera	Heliodinidae	1	1
94208	1	10	2014	Location 1	B	Diptera	Dolichopodidae	1	1
94208	1	10	2014	Location 1	B	Diptera	Dolichopodidae	2	1
94208	1	10	2014	Location 1	B	Diptera	Dolichopodidae	3	2
94208	1	10	2014	Location 1	B	Diptera	Dolichopodidae	4	32
94208	1	10	2014	Location 1	B	Diptera	Cecidomyiidae	1	1
94208	1	10	2014	Location 1	B	Diptera	Phoridae	1	1
94208	1	10	2014	Location 1	B	Diptera	Phoridae	2	1
94208	1	10	2014	Location 1	B	Diptera	Sciaridae	1	3
94208	1	10	2014	Location 1	B	Diptera	Sciaridae	2	3
94208	1	10	2014	Location 1	B	Hymenoptera	Halictidae	1	1
94208	1	10	2014	Location 1	B	Hymenoptera	Encyrtidae	1	1
94208	1	10	2014	Location 1	B	Hymenoptera	Formicidae	1	1
94208	1	10	2014	Location 1	B	Hemiptera	Cicadellidae	1	1
94208	1	10	2014	Location 1	B	Hemiptera	Cicadellidae	2	1
94208	1	10	2014	Location 1	B	Hemiptera	Tropiduchidae	1	1
20535	1	10	2014	Location 1	R	Diptera	Dolichopodidae	1	1
20535	1	10	2014	Location 1	R	Diptera	Dolichopodidae	2	10
20535	1	10	2014	Location 1	R	Diptera	Sciaridae	1	4
20535	1	10	2014	Location 1	R	Diptera	Cecidomyiidae	1	2
20535	1	10	2014	Location 1	R	Hymenoptera	Formicidae	1	1
20535	1	10	2014	Location 1	R	Hymenoptera	Formicidae	2	1
20535	1	10	2014	Location 1	R	Hymenoptera	Encyrtidae	1	1
20535	1	10	2014	Location 1	R	Hymenoptera	Encyrtidae	2	1
20535	1	10	2014	Location 1	R	Hymenoptera	Ceraphronidae	1	1
20535	1	10	2014	Location 1	R	Hymenoptera	Eulophidae	1	1
20535	1	10	2014	Location 1	R	Hemiptera	Cicadellidae	1	1
20535	1	10	2014	Location 1	R	Hemiptera	Cicadellidae	2	1
20535	1	10	2014	Location 1	R	Hemiptera	Cicadellidae	3	2
20535	1	10	2014	Location 1	R	Hemiptera	Delphacidae	1	1
20535	1	10	2014	Location 1	R	Lepidoptera	Tineidae	1	1
20535	1	10	2014	Location 1	R	Coleoptera	Chrysomelidae	1	1
23452	1	10	2014	Location 1	Y	Diptera	Dolichopodidae	1	1
23452	1	10	2014	Location 1	Y	Diptera	Dolichopodidae	2	1
23452	1	10	2014	Location 1	Y	Diptera	Dolichopodidae	3	1
23452	1	10	2014	Location 1	Y	Diptera	Dolichopodidae	4	1
23452	1	10	2014	Location 1	Y	Diptera	Dolichopodidae	5	2
23452	1	10	2014	Location 1	Y	Diptera	Dolichopodidae	6	2
23452	1	10	2014	Location 1	Y	Diptera	Dolichopodidae	7	2
23452	1	10	2014	Location 1	Y	Diptera	Dolichopodidae	8	3
23452	1	10	2014	Location 1	Y	Diptera	Dolichopodidae	9	21
23452	1	10	2014	Location 1	Y	Diptera	Dolichopodidae	10	33
23452	1	10	2014	Location 1	Y	Diptera	Drosophilidae	1	1
23452	1	10	2014	Location 1	Y	Diptera	Phoridae	1	1
23452	1	10	2014	Location 1	Y	Diptera	Phoridae	2	1
23452	1	10	2014	Location 1	Y	Diptera	Lauxaniidae	1	1
23452	1	10	2014	Location 1	Y	Diptera	Agromyzidae	1	1
23452	1	10	2014	Location 1	Y	Diptera	Sciaridae	1	2
23452	1	10	2014	Location 1	Y	Diptera	Sarcophagidae	1	5
23452	1	10	2014	Location 1	Y	Diptera	Cecidomyiidae	1	1
23452	1	10	2014	Location 1	Y	Hymenoptera	Chalcididae	1	1
23452	1	10	2014	Location 1	Y	Hymenoptera	Ichneumonidae	1	1
23452	1	10	2014	Location 1	Y	Hymenoptera	Encyrtidae	1	1
23452	1	10	2014	Location 1	Y	Hymenoptera	Encyrtidae	2	1
23452	1	10	2014	Location 1	Y	Hymenoptera	Formicidae	1	1
23452	1	10	2014	Location 1	Y	Hymenoptera	Formicidae	2	1
23452	1	10	2014	Location 1	Y	Hymenoptera	Formicidae	3	1
23452	1	10	2014	Location 1	Y	Hymenoptera	Formicidae	4	3
23452	1	10	2014	Location 1	Y	Hemiptera	Cicadellidae	1	2
23452	1	10	2014	Location 1	Y	Hemiptera	Delphacidae	1	1
70522	1	10	2014	Location 1	W	Diptera	Dolichopodidae	1	1
70522	1	10	2014	Location 1	W	Diptera	Dolichopodidae	2	1
70522	1	10	2014	Location 1	W	Diptera	Dolichopodidae	3	1
70522	1	10	2014	Location 1	W	Diptera	Dolichopodidae	4	3
70522	1	10	2014	Location 1	W	Diptera	Dolichopodidae	5	4
70522	1	10	2014	Location 1	W	Diptera	Dolichopodidae	6	4
70522	1	10	2014	Location 1	W	Diptera	Dolichopodidae	7	72
70522	1	10	2014	Location 1	W	Diptera	Sarcophagidae	1	1
70522	1	10	2014	Location 1	W	Diptera	Sarcophagidae	2	5
70522	1	10	2014	Location 1	W	Diptera	Sciaridae	1	4
70522	1	10	2014	Location 1	W	Diptera	Sciaridae	2	4
70522	1	10	2014	Location 1	W	Diptera	Scathophagidae	1	1
70522	1	10	2014	Location 1	W	Diptera	Chloropidae	1	1
70522	1	10	2014	Location 1	W	Diptera	Phoridae	1	2
70522	1	10	2014	Location 1	W	Hymenoptera	Formicidae	1	2
70522	1	10	2014	Location 1	W	Hymenoptera	Encyrtidae	1	1
70522	1	10	2014	Location 1	W	Hymenoptera	Encyrtidae	2	1
70522	1	10	2014	Location 1	W	Hemiptera	Cicadellidae	1	2
70522	1	10	2014	Location 1	W	Hemiptera	Delphacidae	1	1
34560	22	4	2014	Location 1	B	Diptera	Dolichopodidae	1	1
34560	22	4	2014	Location 1	B	Diptera	Dolichopodidae	2	4
34560	22	4	2014	Location 1	B	Diptera	Dolichopodidae	3	5
34560	22	4	2014	Location 1	B	Diptera	Phoridae	1	1
34560	22	4	2014	Location 1	B	Diptera	Sarcophagidae	1	1
34560	22	4	2014	Location 1	B	Hymenoptera	Ceraphronidae	1	1
34560	22	4	2014	Location 1	B	Hymenoptera	Formicidae	1	1
46034	22	4	2014	Location 1	R	Diptera	Dolichopodidae	1	1
46034	22	4	2014	Location 1	R	Diptera	Calliphoridae	1	1
46034	22	4	2014	Location 1	R	Diptera	Chironomidae	1	1
46034	22	4	2014	Location 1	R	Diptera	Phoridae	1	1
51792	22	4	2014	Location 1	Y	Diptera	Dolichopodidae	1	1
51792	22	4	2014	Location 1	Y	Diptera	Dolichopodidae	2	1
51792	22	4	2014	Location 1	Y	Diptera	Dolichopodidae	3	1
51792	22	4	2014	Location 1	Y	Diptera	Dolichopodidae	4	1
51792	22	4	2014	Location 1	Y	Diptera	Dolichopodidae	5	1
51792	22	4	2014	Location 1	Y	Diptera	Dolichopodidae	6	1
51792	22	4	2014	Location 1	Y	Diptera	Dolichopodidae	7	2
51792	22	4	2014	Location 1	Y	Diptera	Dolichopodidae	8	2
51792	22	4	2014	Location 1	Y	Diptera	Dolichopodidae	9	3
51792	22	4	2014	Location 1	Y	Diptera	Dolichopodidae	10	6
51792	22	4	2014	Location 1	Y	Diptera	Dolichopodidae	11	10
51792	22	4	2014	Location 1	Y	Diptera	Dolichopodidae	12	11
51792	22	4	2014	Location 1	Y	Diptera	Cecidomyiidae	1	1
51792	22	4	2014	Location 1	Y	Diptera	Phoridae	1	3
51792	22	4	2014	Location 1	Y	Diptera	Tachinidae	1	1
51792	22	4	2014	Location 1	Y	Diptera	Ceratopogonidae	1	1
51792	22	4	2014	Location 1	Y	Diptera	Sarcophagidae	1	1
51792	22	4	2014	Location 1	Y	Hymenoptera	Braconiodae	1	1
51792	22	4	2014	Location 1	Y	Hymenoptera	Braconiodae	2	1
51792	22	4	2014	Location 1	Y	Hymenoptera	Ceraphronidae	1	2
51792	22	4	2014	Location 1	Y	Hymenoptera	Diapriidae	1	1
51792	22	4	2014	Location 1	Y	Hymenoptera	Eulophidae	1	1
51792	22	4	2014	Location 1	Y	Hymenoptera	Encyrtidae	1	1
51792	22	4	2014	Location 1	Y	Hemiptera	Cicadellidae	1	1
51792	22	4	2014	Location 1	Y	Hemiptera	Delphacidae	1	1
8723	22	4	2014	Location 1	W	Diptera	Dolichopodidae	1	2
8723	22	4	2014	Location 1	W	Diptera	Dolichopodidae	2	3
8723	22	4	2014	Location 1	W	Diptera	Dolichopodidae	3	15
8723	22	4	2014	Location 1	W	Diptera	Muscidae	1	1
8723	22	4	2014	Location 1	W	Diptera	Sarcophagidae	1	3
8723	22	4	2014	Location 1	W	Diptera	Sciaridae	1	1
8723	22	4	2014	Location 1	W	Diptera	Sciaridae	2	1
8723	22	4	2014	Location 1	W	Diptera	Chironomidae	1	1
8723	22	4	2014	Location 1	W	Hymenoptera	Formicidae	1	1
8723	22	4	2014	Location 1	W	Hemiptera	Cicadellidae	1	2
8723	22	4	2014	Location 1	W	Hemiptera	Delphacidae	1	1
14935	8	5	2014	Location 1	B	Diptera	Dolichopodidae	1	1
14935	8	5	2014	Location 1	B	Diptera	Dolichopodidae	2	1
14935	8	5	2014	Location 1	B	Diptera	Dolichopodidae	3	2
14935	8	5	2014	Location 1	B	Diptera	Dolichopodidae	4	3
14935	8	5	2014	Location 1	B	Diptera	Drosophilidae	1	1
14935	8	5	2014	Location 1	B	Diptera	Cecidomyiidae	1	1
14935	8	5	2014	Location 1	B	Diptera	Lauxaniidae	1	1
14935	8	5	2014	Location 1	B	Hymenoptera	Halictidae	1	1
14935	8	5	2014	Location 1	B	Hymenoptera	Formicidae	1	1
14935	8	5	2014	Location 1	B	Hymenoptera	Formicidae	2	1
14935	8	5	2014	Location 1	B	Hemiptera	Delphacidae	1	1
14935	8	5	2014	Location 1	B	Hemiptera	Delphacidae	2	1
73800	8	5	2014	Location 1	R	Diptera	Dolichopodidae	1	1
73800	8	5	2014	Location 1	R	Diptera	Dolichopodidae	2	1
73800	8	5	2014	Location 1	R	Diptera	Dolichopodidae	3	1
73800	8	5	2014	Location 1	R	Diptera	Cecidomyiidae	1	4
73800	8	5	2014	Location 1	R	Diptera	Phoridae	1	2
73800	8	5	2014	Location 1	R	Diptera	Ephydridae	1	1
73800	8	5	2014	Location 1	R	Hymenoptera	Formicidae	1	1
73800	8	5	2014	Location 1	R	Hymenoptera	Formicidae	2	1
73800	8	5	2014	Location 1	R	Hemiptera	Cicadellidae	1	1
73800	8	5	2014	Location 1	R	Hemiptera	Cicadellidae	2	2
73800	8	5	2014	Location 1	R	Hemiptera	Delphacidae	1	2
73800	8	5	2014	Location 1	R	Hemiptera	Delphacidae	2	3
99535	8	5	2014	Location 1	Y	Diptera	Dolichopodidae	1	1
99535	8	5	2014	Location 1	Y	Diptera	Dolichopodidae	2	1
99535	8	5	2014	Location 1	Y	Diptera	Dolichopodidae	3	1
99535	8	5	2014	Location 1	Y	Diptera	Dolichopodidae	4	10
99535	8	5	2014	Location 1	Y	Diptera	Dolichopodidae	5	38
99535	8	5	2014	Location 1	Y	Diptera	Chloropidae	1	2
99535	8	5	2014	Location 1	Y	Diptera	Lauxaniidae	1	1
99535	8	5	2014	Location 1	Y	Diptera	Lauxaniidae	2	1
99535	8	5	2014	Location 1	Y	Diptera	Phoridae	1	3
99535	8	5	2014	Location 1	Y	Diptera	Mycetophilidae	1	1
99535	8	5	2014	Location 1	Y	Hymenoptera	Eulophidae	1	1
99535	8	5	2014	Location 1	Y	Hymenoptera	Platygastridae	1	1
99535	8	5	2014	Location 1	Y	Hemiptera	Cicadellidae	1	1
44486	8	5	2014	Location 1	W	Diptera	Dolichopodidae	1	1
44486	8	5	2014	Location 1	W	Diptera	Dolichopodidae	2	2
44486	8	5	2014	Location 1	W	Diptera	Dolichopodidae	3	4
44486	8	5	2014	Location 1	W	Diptera	Dolichopodidae	4	9
44486	8	5	2014	Location 1	W	Diptera	Phoridae	1	1
44486	8	5	2014	Location 1	W	Diptera	Phoridae	2	1
44486	8	5	2014	Location 1	W	Hemiptera	Cicadellidae	1	4
44486	8	5	2014	Location 1	W	Hemiptera	Delphacidae	1	1
34399	3	6	2014	Location 1	B	Diptera	Dolichopodidae	1	2
34399	3	6	2014	Location 1	B	Diptera	Muscidae	1	1
34399	3	6	2014	Location 1	B	Hymenoptera	Anthomyiidae	1	1
45226	3	6	2014	Location 1	R	Diptera	Cecidomyiidae	1	1
45226	3	6	2014	Location 1	R	Diptera	Sciaridae	1	3
45226	3	6	2014	Location 1	R	Diptera	Phoridae	1	1
45226	3	6	2014	Location 1	R	Hymenoptera	Formicidae	1	1
45226	3	6	2014	Location 1	R	Hymenoptera	Formicidae	2	1
45226	3	6	2014	Location 1	R	Hymenoptera	Formicidae	3	1
28512	3	6	2014	Location 1	Y	Diptera	Dolichopodidae	1	1
28512	3	6	2014	Location 1	Y	Diptera	Dolichopodidae	2	1
28512	3	6	2014	Location 1	Y	Diptera	Dolichopodidae	3	1
28512	3	6	2014	Location 1	Y	Diptera	Dolichopodidae	4	12
28512	3	6	2014	Location 1	Y	Diptera	Sarcophagidae	1	1
28512	3	6	2014	Location 1	Y	Diptera	Sciaridae	1	1
28512	3	6	2014	Location 1	Y	Diptera	Lauxaniidae	1	1
28512	3	6	2014	Location 1	Y	Hymenoptera	Diapridae	1	1
28512	3	6	2014	Location 1	Y	Hymenoptera	Encyrtidae	1	2
28512	3	6	2014	Location 1	Y	Hymenoptera	Braconiodae	1	3
28512	3	6	2014	Location 1	Y	Hymenoptera	Formicidae	1	1
28512	3	6	2014	Location 1	Y	Hemiptera	Membracidae	1	1
28512	3	6	2014	Location 1	Y	Lepidoptera	Tineidae	1	1
45644	3	6	2014	Location 1	W	Diptera	Dolichopodidae	1	3
45644	3	6	2014	Location 1	W	Diptera	Sarcophagidae	1	3
45644	3	6	2014	Location 1	W	Diptera	Muscidae	1	1
45644	3	6	2014	Location 1	W	Diptera	Phoridae	1	1
45644	3	6	2014	Location 1	W	Lepidoptera	Tineidae	1	1
30736	29	10	2014	Location 1	B	Diptera	Dolichopodidae	1	1
30736	29	10	2014	Location 1	B	Diptera	Dolichopodidae	2	1
30736	29	10	2014	Location 1	B	Diptera	Dolichopodidae	3	6
30736	29	10	2014	Location 1	B	Diptera	Phoridae	1	1
30736	29	10	2014	Location 1	B	Diptera	Phoridae	2	1
30736	29	10	2014	Location 1	B	Diptera	Phoridae	3	4
30736	29	10	2014	Location 1	B	Hymenoptera	Formicidae	1	1
30736	29	10	2014	Location 1	B	Hymenoptera	Formicidae	2	1
30736	29	10	2014	Location 1	B	Hymenoptera	Formicidae	3	1
30736	29	10	2014	Location 1	B	Hymenoptera	Formicidae	4	1
30736	29	10	2014	Location 1	B	Hymenoptera	Tiphiidae	1	1
30736	29	10	2014	Location 1	B	Hemiptera	Delphacidae	1	1
30736	29	10	2014	Location 1	B	Hemiptera	Delphacidae	2	1
18462	29	10	2014	Location 1	R	Diptera	Dolichopodidae	1	3
18462	29	10	2014	Location 1	R	Diptera	Cecidomyiidae	1	1
18462	29	10	2014	Location 1	R	Diptera	Phoridae	1	1
18462	29	10	2014	Location 1	R	Diptera	Phoridae	2	1
18462	29	10	2014	Location 1	R	Hymenoptera	Formicidae	1	2
18462	29	10	2014	Location 1	R	Hemiptera	Cicadellidae	1	1
18462	29	10	2014	Location 1	R	Hemiptera	Delphacidae	1	2
66925	29	10	2014	Location 1	Y	Diptera	Dolichopodidae	1	1
66925	29	10	2014	Location 1	Y	Diptera	Dolichopodidae	2	2
66925	29	10	2014	Location 1	Y	Diptera	Dolichopodidae	3	7
66925	29	10	2014	Location 1	Y	Diptera	Dolichopodidae	4	8
66925	29	10	2014	Location 1	Y	Diptera	Cecidomyiidae	1	1
66925	29	10	2014	Location 1	Y	Diptera	Lauxaniidae	1	1
66925	29	10	2014	Location 1	Y	Diptera	Sciaridae	1	1
66925	29	10	2014	Location 1	Y	Diptera	Sarcophagidae	1	1
66925	29	10	2014	Location 1	Y	Diptera	Phoridae	1	1
66925	29	10	2014	Location 1	Y	Hymenoptera	Formicidae	1	2
66925	29	10	2014	Location 1	Y	Hymenoptera	Encyrtidae	1	1
66925	29	10	2014	Location 1	Y	Hymenoptera	Encyrtidae	2	1
66925	29	10	2014	Location 1	Y	Hymenoptera	Platygastridae	1	2
66925	29	10	2014	Location 1	Y	Hemiptera	Cicadellidae	1	1
66925	29	10	2014	Location 1	Y	Hemiptera	Delphacidae	1	1
64019	29	10	2014	Location 1	W	Diptera	Dolichopodidae	1	3
64019	29	10	2014	Location 1	W	Diptera	Dolichopodidae	2	6
64019	29	10	2014	Location 1	W	Diptera	Lauxaniidae	1	1
64019	29	10	2014	Location 1	W	Diptera	Lauxaniidae	2	1
64019	29	10	2014	Location 1	W	Diptera	Therevidae	1	1
64019	29	10	2014	Location 1	W	Diptera	Sarcophagidae	1	2
64019	29	10	2014	Location 1	W	Diptera	Phoridae	1	1
64019	29	10	2014	Location 1	W	Hymenoptera	Formicidae	1	1
64019	29	10	2014	Location 1	W	Hemiptera	Cicadellidae	1	1
08817	12	11	2014	Location 1	B	Diptera	Sciaridae	1	1
81171	12	11	2014	Location 1	R	Diptera	Dolichopodidae	1	2
47588	12	11	2014	Location 1	Y	Diptera	Dolichopodidae	1	5
47588	12	11	2014	Location 1	Y	Diptera	Drosophilidae	1	4
47588	12	11	2014	Location 1	Y	Diptera	Phoridae	1	1
47588	12	11	2014	Location 1	Y	Diptera	Lauxaniidae	1	1
47588	12	11	2014	Location 1	Y	Diptera	Muscidae	1	2
47588	12	11	2014	Location 1	Y	Diptera	Cecidomyiidae	1	1
47588	12	11	2014	Location 1	Y	Diptera	Ephydridae	1	1
47588	12	11	2014	Location 1	Y	Diptera	Agromyzidae	1	1
47588	12	11	2014	Location 1	Y	Hymenoptera	Formicidae	1	1
47588	12	11	2014	Location 1	Y	Hymenoptera	Formicidae	2	1
47588	12	11	2014	Location 1	Y	Hymenoptera	Braconidae	1	1
47588	12	11	2014	Location 1	Y	Hymenoptera	Encyrtidae	1	1
47588	12	11	2014	Location 1	Y	Hymenoptera	Eulophidae	1	1
47588	12	11	2014	Location 1	Y	Hemiptera	Cicadellidae	1	2
18702	12	11	2014	Location 1	W	Diptera	Dolichopodidae	1	3
18702	12	11	2014	Location 1	W	Diptera	Phoridae	1	1
18702	12	11	2014	Location 1	W	Diptera	Sarcophagidae	1	1
18702	12	11	2014	Location 1	W	Hymenoptera	Formicidae	1	1
18702	12	11	2014	Location 1	W	Hymenoptera	Formicidae	2	1
18702	12	11	2014	Location 1	W	Hemiptera	Cicadellidae	1	2
29534	5	12	2014	Location 1	B	Diptera	Dolichopodidae	1	1
29534	5	12	2014	Location 1	B	Diptera	Dolichopodidae	2	1
29534	5	12	2014	Location 1	B	Diptera	Sciaridae	1	2
29534	5	12	2014	Location 1	B	Diptera	Chloropidae	1	1
29534	5	12	2014	Location 1	B	Hymenoptera	Encyrtidae	1	1
29534	5	12	2014	Location 1	B	Hymenoptera	Formicidae	1	1
29534	5	12	2014	Location 1	B	Lepidoptera	Tineidae	1	1
22451	5	12	2014	Location 1	R	Diptera	Psychodidae	1	1
22451	5	12	2014	Location 1	R	Hymenoptera	Formicidae	1	1
06189	5	12	2014	Location 1	Y	Diptera	Dolichopodidae	1	1
06189	5	12	2014	Location 1	Y	Diptera	Dolichopodidae	2	1
06189	5	12	2014	Location 1	Y	Diptera	Drosophilidae	1	2
06189	5	12	2014	Location 1	Y	Diptera	Lauxaniidae	1	1
06189	5	12	2014	Location 1	Y	Diptera	Sarcophagidae	1	2
06189	5	12	2014	Location 1	Y	Diptera	Sciaridae	1	1
06189	5	12	2014	Location 1	Y	Hymenoptera	Vespidae	1	1
06189	5	12	2014	Location 1	Y	Hymenoptera	Formicidae	1	1
06189	5	12	2014	Location 1	Y	Hymenoptera	Formicidae	2	1
06189	5	12	2014	Location 1	Y	Hymenoptera	Formicidae	3	2
06189	5	12	2014	Location 1	Y	Hymenoptera	Aphelinidae	1	1
32105	5	12	2014	Location 1	W	Diptera	Sarcophagidae	1	1
32105	5	12	2014	Location 1	W	Diptera	Lauxaniidae	1	1
32105	5	12	2014	Location 1	W	Diptera	Psychodidae	1	1
32105	5	12	2014	Location 1	W	Diptera	Sciaridae	1	1
32105	5	12	2014	Location 1	W	Diptera	Scathophagidae	1	1
32105	5	12	2014	Location 1	W	Hymenoptera	Formicidae	1	1
32105	5	12	2014	Location 1	W	Hymenoptera	Formicidae	2	2
32105	5	12	2014	Location 1	W	Hymenoptera	Formicidae	3	2
32105	5	12	2014	Location 1	W	Hymenoptera	Braconidae	1	1
64827	16	7	2014	Location 1	B	Diptera	Dolichopodidae	1	1
64827	16	7	2014	Location 1	B	Diptera	Dolichopodidae	2	1
64827	16	7	2014	Location 1	B	Diptera	Dolichopodidae	3	1
64827	16	7	2014	Location 1	B	Diptera	Dolichopodidae	4	1
64827	16	7	2014	Location 1	B	Diptera	Dolichopodidae	5	4
64827	16	7	2014	Location 1	B	Diptera	Sarcophagidae	1	1
64827	16	7	2014	Location 1	B	Hymenoptera	Formicidae	1	7
00239	16	7	2014	Location 1	R	Diptera	Dolichopodidae	1	1
00239	16	7	2014	Location 1	R	Diptera	Dolichopodidae	2	1
00239	16	7	2014	Location 1	R	Hymenoptera	Formicidae	1	1
00239	16	7	2014	Location 1	R	Hymenoptera	Cynipidae	1	1
09673	16	7	2014	Location 1	Y	Diptera	Dolichopodidae	1	1
09673	16	7	2014	Location 1	Y	Diptera	Dolichopodidae	2	2
09673	16	7	2014	Location 1	Y	Diptera	Dolichopodidae	3	8
09673	16	7	2014	Location 1	Y	Diptera	Dolichopodidae	4	9
09673	16	7	2014	Location 1	Y	Hymenoptera	Encyrtidae	1	2
09673	16	7	2014	Location 1	Y	Hemiptera	Delphacidae	1	1
08868	16	7	2014	Location 1	W	Diptera	Dolichopodidae	1	1
08868	16	7	2014	Location 1	W	Diptera	Dolichopodidae	2	1
08868	16	7	2014	Location 1	W	Diptera	Dolichopodidae	3	2
08868	16	7	2014	Location 1	W	Diptera	Dolichopodidae	4	12
08868	16	7	2014	Location 1	W	Diptera	Sarcophagidae	1	2
08868	16	7	2014	Location 1	W	Hymenoptera	Formicidae	1	1
08868	16	7	2014	Location 1	W	Hymenoptera	Formicidae	2	1
88947	29	7	2014	Location 1	B	Diptera	Dolichopodidae	1	4
88947	29	7	2014	Location 1	B	Diptera	Phoridae	1	1
88947	29	7	2014	Location 1	B	Diptera	Phoridae	2	1
88947	29	7	2014	Location 1	B	Diptera	Phoridae	3	1
88947	29	7	2014	Location 1	B	Diptera	Sciaridae	1	1
88947	29	7	2014	Location 1	B	Hymenoptera	Encyrtidae	1	1
88947	29	7	2014	Location 1	B	Hymenoptera	Formicidae	1	1
88947	29	7	2014	Location 1	B	Hymenoptera	Halictidae	1	1
58856	29	7	2014	Location 1	R	Diptera	Cecidomyiidae	1	1
58856	29	7	2014	Location 1	R	Diptera	Cecidomyiidae	2	2
58856	29	7	2014	Location 1	R	Hymenoptera	Formicidae	1	1
58856	29	7	2014	Location 1	R	Hymenoptera	Formicidae	2	1
62035	29	7	2014	Location 1	Y	Diptera	Dolichopodidae	1	1
62035	29	7	2014	Location 1	Y	Diptera	Dolichopodidae	2	1
62035	29	7	2014	Location 1	Y	Diptera	Dolichopodidae	3	16
62035	29	7	2014	Location 1	Y	Diptera	Sarcophagidae	1	3
62035	29	7	2014	Location 1	Y	Hymenoptera	Encyrtidae	1	1
62035	29	7	2014	Location 1	Y	Hymenoptera	Eulophidae	1	1
04455	29	7	2014	Location 1	W	Diptera	Dolichopodidae	1	4
04455	29	7	2014	Location 1	W	Diptera	Empididae	1	1
42499	17	6	2014	Location 1	B	Diptera	Dolichopodidae	1	1
42499	17	6	2014	Location 1	B	Diptera	Dolichopodidae	2	2
42499	17	6	2014	Location 1	B	Hymenoptera	Formicidae	1	1
42499	17	6	2014	Location 1	B	Hemiptera	Delphacidae	1	1
06620	17	6	2014	Location 1	R	Diptera	Dolichopodidae	1	2
06620	17	6	2014	Location 1	R	Diptera	Phoridae	1	1
06620	17	6	2014	Location 1	R	Hymenoptera	Formicidae	1	1
06620	17	6	2014	Location 1	R	Coleoptera	Chrysomelidae	1	2
46829	17	6	2014	Location 1	Y	Diptera	Dolichopodidae	1	4
46829	17	6	2014	Location 1	Y	Hymenoptera	Formicidae	1	1
46829	17	6	2014	Location 1	Y	Hymenoptera	Formicidae	2	1
46829	17	6	2014	Location 1	Y	Hemiptera	Delphacidae	1	1
84931	17	6	2014	Location 1	W	Diptera	Dolichopodidae	1	1
84931	17	6	2014	Location 1	W	Diptera	Dolichopodidae	2	1
84931	17	6	2014	Location 1	W	Diptera	Dolichopodidae	3	1
84931	17	6	2014	Location 1	W	Diptera	Dolichopodidae	4	2
84931	17	6	2014	Location 1	W	Diptera	Dolichopodidae	5	14
84931	17	6	2014	Location 1	W	Diptera	Lauxaniidae	1	1
84931	17	6	2014	Location 1	W	Diptera	Phoridae	1	2
84931	17	6	2014	Location 1	W	Hymenoptera	Formicidae	1	1
65280	26	8	2014	Location 1	W	Diptera	Sarcophagidae	1	3
65280	26	8	2014	Location 1	W	Hymenoptera	Formicidae	1	1
65280	26	8	2014	Location 1	W	Hymenoptera	Formicidae	2	1
65280	26	8	2014	Location 1	W	Hymenoptera	Formicidae	3	1
74999	26	8	2014	Location 1	Y	Diptera	Dolichopodidae	1	1
74999	26	8	2014	Location 1	Y	Diptera	Dolichopodidae	2	3
74999	26	8	2014	Location 1	Y	Diptera	Dolichopodidae	3	4
74999	26	8	2014	Location 1	Y	Diptera	Dolichopodidae	4	5
74999	26	8	2014	Location 1	Y	Diptera	Cecidomyiidae	1	3
74999	26	8	2014	Location 1	Y	Diptera	Ceratopogonidae	1	1
74999	26	8	2014	Location 1	Y	Diptera	Phoridae	1	1
74999	26	8	2014	Location 1	Y	Hymenoptera	Formicidae	1	1
74999	26	8	2014	Location 1	Y	Hymenoptera	Formicidae	2	1
74999	26	8	2014	Location 1	Y	Hymenoptera	Formicidae	3	4
67420	26	8	2014	Location 1	R	Diptera	Cecidomyiidae	1	2
67420	26	8	2014	Location 1	R	Diptera	Cecidomyiidae	2	3
67420	26	8	2014	Location 1	R	Hymenoptera	Formicidae	1	1
67420	26	8	2014	Location 1	R	Coleoptera	Scarbaeidae	1	1
27602	26	8	2014	Location 1	B	Diptera	Dolichopodidae	1	2
27602	26	8	2014	Location 1	B	Diptera	Cecidomyiidae	1	3
09614	13	8	2014	Location 1	B	Diptera	Dolichopodidae	1	3
09614	13	8	2014	Location 1	B	Diptera	Dolichopodidae	2	40
09614	13	8	2014	Location 1	B	Diptera	Cecidomyiidae	1	1
09614	13	8	2014	Location 1	B	Diptera	Cecidomyiidae	2	2
09614	13	8	2014	Location 1	B	Diptera	Lauxaniidae	1	1
09614	13	8	2014	Location 1	B	Diptera	Sarcophagidae	1	1
09614	13	8	2014	Location 1	B	Hymenoptera	Encyrtidae	1	1
09614	13	8	2014	Location 1	B	Hemiptera	Delphacidae	1	1
09614	13	8	2014	Location 1	B	Hemiptera	Delphacidae	2	1
09614	13	8	2014	Location 1	B	Coleoptera	Chrysomelidae	1	2
77974	13	8	2014	Location 1	R	Diptera	Dolichopodidae	1	2
77974	13	8	2014	Location 1	R	Diptera	Phoridae	1	1
77974	13	8	2014	Location 1	R	Diptera	Phoridae	2	2
77974	13	8	2014	Location 1	R	Hymenoptera	Platygastridae	1	1
85345	13	8	2014	Location 1	Y	Diptera	Dolichopodidae	1	2
85345	13	8	2014	Location 1	Y	Diptera	Dolichopodidae	2	3
85345	13	8	2014	Location 1	Y	Diptera	Dolichopodidae	3	3
85345	13	8	2014	Location 1	Y	Diptera	Dolichopodidae	4	3
85345	13	8	2014	Location 1	Y	Diptera	Dolichopodidae	5	8
85345	13	8	2014	Location 1	Y	Diptera	Dolichopodidae	6	14
85345	13	8	2014	Location 1	Y	Diptera	Dolichopodidae	7	25
85345	13	8	2014	Location 1	Y	Diptera	Cecidomyiidae	1	1
85345	13	8	2014	Location 1	Y	Diptera	Cecidomyiidae	2	2
85345	13	8	2014	Location 1	Y	Diptera	Agromyzidae	1	1
85345	13	8	2014	Location 1	Y	Diptera	Ephydridae	1	1
85345	13	8	2014	Location 1	Y	Diptera	Sarcophagidae	1	4
85345	13	8	2014	Location 1	Y	Hymenoptera	Formicidae	1	1
85345	13	8	2014	Location 1	Y	Hymenoptera	Formicidae	2	1
85345	13	8	2014	Location 1	Y	Hymenoptera	Formicidae	3	2
85345	13	8	2014	Location 1	Y	Hymenoptera	Encyrtidae	1	1
85345	13	8	2014	Location 1	Y	Hymenoptera	Encyrtidae	2	5
85345	13	8	2014	Location 1	Y	Hymenoptera	Mymaridae	1	1
85345	13	8	2014	Location 1	Y	Hymenoptera	Halictidae	1	1
85345	13	8	2014	Location 1	Y	Hemiptera	Cicadellidae	1	1
48180	13	8	2014	Location 1	W	Diptera	Dolichopodidae	1	1
48180	13	8	2014	Location 1	W	Diptera	Dolichopodidae	2	1
48180	13	8	2014	Location 1	W	Diptera	Dolichopodidae	3	1
48180	13	8	2014	Location 1	W	Diptera	Dolichopodidae	4	3
48180	13	8	2014	Location 1	W	Diptera	Dolichopodidae	5	71
48180	13	8	2014	Location 1	W	Diptera	Cecidomyiidae	1	1
48180	13	8	2014	Location 1	W	Diptera	Cecidomyiidae	2	3
48180	13	8	2014	Location 1	W	Diptera	Phoridae	1	1
48180	13	8	2014	Location 1	W	Diptera	Sarcophagidae	1	1
48180	13	8	2014	Location 1	W	Diptera	Sarcophagidae	2	2
48180	13	8	2014	Location 1	W	Diptera	Sarcophagidae	3	7
48180	13	8	2014	Location 1	W	Hymenoptera	Ceraphronidae	1	1
48180	13	8	2014	Location 1	W	Hymenoptera	Formicidae	1	2
48180	13	8	2014	Location 1	W	Hymenoptera	Formicidae	2	1
48180	13	8	2014	Location 1	W	Hymenoptera	Pompilidae	1	1
48180	13	8	2014	Location 1	W	Hymenoptera	Platygastridae	1	1
48180	13	8	2014	Location 1	W	Hemiptera	Delphacidae	1	1
48180	13	8	2014	Location 1	W	Hemiptera	Delphacidae	2	1
48180	13	8	2014	Location 1	W	Lepidoptera	Tortricidae	1	1
48180	13	8	2014	Location 1	W	Coleoptera	Chrysomelidae	1	2
90592	17	9	2014	Location 1	B	Diptera	Dolichopodidae	1	2
90592	17	9	2014	Location 1	B	Diptera	Dolichopodidae	2	20
90592	17	9	2014	Location 1	B	Diptera	Cecidomyiidae	1	1
90592	17	9	2014	Location 1	B	Diptera	Simuliidae	1	1
90592	17	9	2014	Location 1	B	Diptera	Phoridae	1	1
90592	17	9	2014	Location 1	B	Hemiptera	Cicadellidae	1	1
88221	17	9	2014	Location 1	R	Diptera	Dolichopodidae	1	3
88221	17	9	2014	Location 1	R	Diptera	Cecidomyiidae	1	1
88221	17	9	2014	Location 1	R	Diptera	Cecidomyiidae	2	3
88221	17	9	2014	Location 1	R	Diptera	Simuliidae	1	3
88221	17	9	2014	Location 1	R	Diptera	Lauxaniidae	1	1
88221	17	9	2014	Location 1	R	Hymenoptera	Diapriidae	1	1
88221	17	9	2014	Location 1	R	Hymenoptera	Formicidae	1	1
88221	17	9	2014	Location 1	R	Hemiptera	Cicadellidae	1	1
88221	17	9	2014	Location 1	R	Hemiptera	Delphacidae	1	1
34476	17	9	2014	Location 1	Y	Diptera	Dolichopodidae	1	1
34476	17	9	2014	Location 1	Y	Diptera	Dolichopodidae	2	19
34476	17	9	2014	Location 1	Y	Diptera	Cecidomyiidae	1	1
34476	17	9	2014	Location 1	Y	Diptera	Cecidomyiidae	2	1
34476	17	9	2014	Location 1	Y	Hymenoptera	Encyrtidae	1	3
34476	17	9	2014	Location 1	Y	Hymenoptera	Eulophidae	1	1
34476	17	9	2014	Location 1	Y	Hymenoptera	Formicidae	1	1
34476	17	9	2014	Location 1	Y	Hemiptera	Delphacidae	1	1
34476	17	9	2014	Location 1	Y	Hemiptera	Delphacidae	2	2
34476	17	9	2014	Location 1	Y	Hemiptera	Cicadellidae	1	1
75917	17	9	2014	Location 1	W	Diptera	Dolichopodidae	1	66
75917	17	9	2014	Location 1	W	Diptera	Cecidomyiidae	1	3
75917	17	9	2014	Location 1	W	Diptera	Sciaridae	1	1
75917	17	9	2014	Location 1	W	Diptera	Phoridae	1	2
75917	17	9	2014	Location 1	W	Diptera	Phoridae	2	4
75917	17	9	2014	Location 1	W	Diptera	Simuliidae	1	1
75917	17	9	2014	Location 1	W	Diptera	Sarcophagidae	1	1
75917	17	9	2014	Location 1	W	Hymenoptera	Formicidae	1	1
75917	17	9	2014	Location 1	W	Hymenoptera	Mymaridae	1	1
14720	15	10	2014	Location 2	B	Diptera	Dolichopodidae	1	1
14720	15	10	2014	Location 2	B	Diptera	Dolichopodidae	2	3
14720	15	10	2014	Location 2	B	Diptera	Dolichopodidae	3	4
14720	15	10	2014	Location 2	B	Diptera	Dolichopodidae	4	6
14720	15	10	2014	Location 2	B	Diptera	Dolichopodidae	5	25
14720	15	10	2014	Location 2	B	Diptera	Empididae	1	1
14720	15	10	2014	Location 2	B	Diptera	Phoridae	1	2
14720	15	10	2014	Location 2	B	Diptera	Sciaridae	1	1
14720	15	10	2014	Location 2	B	Diptera	Sciaridae	2	2
14720	15	10	2014	Location 2	B	Hymenoptera	Encyrtidae	1	1
50329	15	10	2014	Location 2	R	Diptera	Dolichopodidae	1	2
50329	15	10	2014	Location 2	R	Diptera	Ceratopogonidae	1	1
50329	15	10	2014	Location 2	R	Diptera	Chloropidae	1	2
50329	15	10	2014	Location 2	R	Diptera	Phoridae	1	1
50329	15	10	2014	Location 2	R	Diptera	Scatopsidae	1	1
50329	15	10	2014	Location 2	R	Hymenoptera	Encyrtidae	1	1
50329	15	10	2014	Location 2	R	Hymenoptera	Formicidae	1	1
50329	15	10	2014	Location 2	R	Hymenoptera	Mymaridae	1	1
50329	15	10	2014	Location 2	R	Hemiptera	Chrysomelidae	1	1
50329	15	10	2014	Location 2	R	Coleptera	Dolichopodidae	1	1
6343	15	10	2014	Location 2	R	Diptera	Dolichopodidae	2	2
6343	15	10	2014	Location 2	R	Diptera	Dolichopodidae	3	14
6343	15	10	2014	Location 2	R	Diptera	Dolichopodidae	4	13
6343	15	10	2014	Location 2	R	Diptera	Chloropidae	1	1
6343	15	10	2014	Location 2	R	Diptera	Chloropidae	2	7
6343	15	10	2014	Location 2	R	Diptera	Ephydridae	1	1
6343	15	10	2014	Location 2	R	Diptera	Lauxaniidae	1	3
6343	15	10	2014	Location 2	R	Diptera	Phoridae	1	1
6343	15	10	2014	Location 2	R	Diptera	Phoridae	2	1
6343	15	10	2014	Location 2	R	Diptera	Phoridae	3	1
6343	15	10	2014	Location 2	R	Diptera	Phoridae	4	2
6343	15	10	2014	Location 2	R	Diptera	Sarcophagidae	1	4
6343	15	10	2014	Location 2	R	Diptera	Sepsidae	1	1
6343	15	10	2014	Location 2	R	Diptera	Braconidae	1	1
6343	15	10	2014	Location 2	R	Hymenoptera	Braconidae	2	1
6343	15	10	2014	Location 2	R	Hymenoptera	Encyrtidae	1	1
6343	15	10	2014	Location 2	R	Hymenoptera	Encyrtidae	2	1
6343	15	10	2014	Location 2	R	Hymenoptera	Formicidae	1	1
6343	15	10	2014	Location 2	R	Hymenoptera	Mymaridae	1	1
6343	15	10	2014	Location 2	R	Hymenoptera	Mymaridae	2	2
6343	15	10	2014	Location 2	R	Hymenoptera	Cercopidae	1	1
6343	15	10	2014	Location 2	R	Hemiptera	Cicadellidae	1	3
6343	15	10	2014	Location 2	R	Hemiptera	Delphacidae	1	1
6343	15	10	2014	Location 2	R	Hemiptera	Miridae	1	1
6343	15	10	2014	Location 2	R	Hemiptera	Dolichopodidae	1	1
18525	15	10	2014	Location 2	W	Diptera	Dolichopodidae	2	1
18525	15	10	2014	Location 2	W	Diptera	Dolichopodidae	3	1
18525	15	10	2014	Location 2	W	Diptera	Dolichopodidae	4	26
18525	15	10	2014	Location 2	W	Diptera	Dolichopodidae	5	11
18525	15	10	2014	Location 2	W	Diptera	Drosophilidae	1	1
18525	15	10	2014	Location 2	W	Diptera	Ceratopogonidae	1	1
18525	15	10	2014	Location 2	W	Diptera	Ceratopogonidae	2	1
18525	15	10	2014	Location 2	W	Diptera	Ceratopogonidae	3	1
18525	15	10	2014	Location 2	W	Diptera	Phoridae	1	1
18525	15	10	2014	Location 2	W	Diptera	Phoridae	2	1
18525	15	10	2014	Location 2	W	Diptera	Phoridae	3	2
18525	15	10	2014	Location 2	W	Diptera	Sarcophagidae	1	8
18525	15	10	2014	Location 2	W	Diptera	Sciaridae	1	1
18525	15	10	2014	Location 2	W	Hymenoptera	Encyrtidae	1	1
18525	15	10	2014	Location 2	W	Hemiptera	Miridae	1	3
93363	16	4	2013	Location 2	B	Diptera	Dolichopodidae		2
93363	16	4	2013	Location 2	B	Diptera	Muscidae		1
93363	16	4	2013	Location 2	B	Diptera	Psychodidae		1
93363	16	4	2013	Location 2	B	Hymenoptera	Formicidae		1
93363	16	4	2013	Location 2	B	Hemiptera	Cicadellidae		1
93363	16	4	2013	Location 2	B	Lepidoptera	Tineidae		1
93363	16	4	2013	Location 2	B	Coleoptera	Staphylinidae		1
57488	16	4	2013	Location 2	R	Diptera	Dolichopodidae		1
57488	16	4	2013	Location 2	R	Diptera	Chironomidae		1
57488	16	4	2013	Location 2	R	Diptera	Sciaridae		1
57488	16	4	2013	Location 2	R	Diptera	Stratiomyidae		1
57488	16	4	2013	Location 2	R	Hymenoptera	Formicidae		1
57488	16	4	2013	Location 2	R	Hymenoptera	Pompilidae		1
57488	16	4	2013	Location 2	R	Hemiptera	Delphacidae		2
57488	16	4	2013	Location 2	R	Lepidoptera	Nepticulidae		1
57488	16	4	2013	Location 2	R	Coleoptera	Chrysomelidae		1
57488	16	4	2013	Location 2	R	Coleoptera	Mycetophagidae		1
57488	16	4	2013	Location 2	R	Coleoptera	Staphylinidae		1
31759	16	4	2013	Location 2	Y	Diptera	Anthomyiidae		1
31759	16	4	2013	Location 2	Y	Diptera	Dolichopodidae		24
31759	16	4	2013	Location 2	Y	Diptera	Lauxaniidae		1
31759	16	4	2013	Location 2	Y	Diptera	Muscidae		1
31759	16	4	2013	Location 2	Y	Diptera	Phoridae		2
31759	16	4	2013	Location 2	Y	Diptera	Sarcophagidae		1
31759	16	4	2013	Location 2	Y	Hymenoptera	Formicidae		6
31759	16	4	2013	Location 2	Y	Hemiptera	Cicadellidae		13
31759	16	4	2013	Location 2	Y	Lepidoptera	Noctuidae		1
31759	16	4	2013	Location 2	Y	Coleoptera	Staphylinidae		2
98752	16	4	2013	Location 2	W	Diptera	Dolichopodidae		4
98752	16	4	2013	Location 2	W	Diptera	Muscidae		4
98752	16	4	2013	Location 2	W	Diptera	Phoridae		15
98752	16	4	2013	Location 2	W	Diptera	Sarcophagidae		6
98752	16	4	2013	Location 2	W	Diptera	Sciaridae		1
98752	16	4	2013	Location 2	W	Diptera	Tachinidae		1
98752	16	4	2013	Location 2	W	Hymenoptera	Encyrtidae		1
98752	16	4	2013	Location 2	W	Hymenoptera	Formicidae		8
98752	16	4	2013	Location 2	W	Hemiptera	Cicadellidae		2
98752	16	4	2013	Location 2	W	Coleoptera	Staphylinidae		1
	20	3	2013	Location 2	B	Diptera	Dolichopodidae		3
	20	3	2013	Location 2	B	Diptera	Ephydridae		1
	20	3	2013	Location 2	B	Hymenoptera	Chalcididae		1
	20	3	2013	Location 2	B	Hymenoptera	Formicidae		1
	20	3	2013	Location 2	B	Hymenoptera	Ichneumonidae		1
	20	3	2013	Location 2	B	Lepidoptera	Tineidae		1
	20	3	2013	Location 2	R	Diptera	Phoridae		1
	20	3	2013	Location 2	R	Diptera	Sciaridae		1
	20	3	2013	Location 2	R	Hymenoptera	Formicidae		1
	20	3	2013	Location 2	R	Lepidoptera	Tineidae		1
	20	3	2013	Location 2	Y	Diptera	Dolichopodidae		3
	20	3	2013	Location 2	Y	Diptera	Lauxaniidae		1
	20	3	2013	Location 2	Y	Diptera	Muscidae		1
	20	3	2013	Location 2	Y	Diptera	Phoridae		5
	20	3	2013	Location 2	Y	Hymenoptera	Crabronidae		1
	20	3	2013	Location 2	Y	Hymenoptera	Platygastridae		1
	20	3	2013	Location 2	Y	Hemiptera	Cicadellidae		1
	20	3	2013	Location 2	Y	Hemiptera	Membracidae		1
	20	3	2013	Location 2	W	Diptera	Dolichopodidae		2
	20	3	2013	Location 2	W	Diptera	Cecidomyiidae		1
	20	3	2013	Location 2	W	Diptera	Phoridae		5
	20	3	2013	Location 2	W	Hymenoptera	Braconidae		1
	20	3	2013	Location 2	W	Hymenoptera	Chalcididae		1
	2	4	2013	Location 2	B	Diptera	Dolichopodidae		2
	2	4	2013	Location 2	B	Diptera	Phoridae		1
	2	4	2013	Location 2	B	Hymenoptera	Formicidae		1
	2	4	2013	Location 2	B	Hemiptera	Cicadellidae		2
	2	4	2013	Location 2	Y	Diptera	Dolichopodidae		8
	2	4	2013	Location 2	Y	Diptera	Cecidomyiidae		1
	2	4	2013	Location 2	Y	Diptera	Ceratopogonidae		1
	2	4	2013	Location 2	Y	Diptera	Chloropidae		1
	2	4	2013	Location 2	Y	Diptera	Lauxaniidae		1
	2	4	2013	Location 2	Y	Diptera	Phoridae		1
	2	4	2013	Location 2	Y	Diptera	Sciaridae		1
	2	4	2013	Location 2	Y	Hymenoptera	Bethylidae		1
	2	4	2013	Location 2	Y	Hymenoptera	Braconidae		1
	2	4	2013	Location 2	Y	Hymenoptera	Pergidae		1
	2	4	2013	Location 2	Y	Hymenoptera	Platygastridae		1
	2	4	2013	Location 2	W	Diptera	Dolichopodidae		3
	2	4	2013	Location 2	W	Diptera	Sarcophagidae		2
	2	4	2013	Location 2	W	Hymenoptera	Formicidae		1
	2	4	2013	Location 2	W	Hymenoptera	Halictidae		1
	2	4	2013	Location 2	W	Hymenoptera	Pompilidae		1
	2	4	2013	Location 2	W	Coleoptera	Chrysomelidae		1
	5	3	2013	Location 2	B	Diptera	Dolichopodidae		1
	5	3	2013	Location 2	B	Diptera	Cecidomyiidae		1
	5	3	2013	Location 2	B	Diptera	Psychodidae		2
	5	3	2013	Location 2	B	Hymenoptera	Cynipidae		1
	5	3	2013	Location 2	B	Hymenoptera	Encyrtidae		1
	5	3	2013	Location 2	B	Hymenoptera	Halictidae		1
	5	3	2013	Location 2	B	Hemiptera	Cicadellidae		1
	5	3	2013	Location 2	B	Hemiptera	Delphacidae		1
	5	3	2013	Location 2	R	Diptera	Dolichopodidae		1
	5	3	2013	Location 2	R	Diptera	Culicidae		1
	5	3	2013	Location 2	R	Diptera	Psychodidae		1
	5	3	2013	Location 2	R	Diptera	Sciaridae		1
	5	3	2013	Location 2	Y	Diptera	Dolichopodidae		3
	5	3	2013	Location 2	Y	Diptera	Chloropidae		1
	5	3	2013	Location 2	Y	Diptera	Ephydridae		1
	5	3	2013	Location 2	Y	Diptera	Sarcophagidae		2
	5	3	2013	Location 2	Y	Diptera	Scatopsidae		1
	5	3	2013	Location 2	Y	Diptera	Sciaridae		1
	5	3	2013	Location 2	Y	Diptera	Simuliidae		1
	5	3	2013	Location 2	Y	Diptera	Tachinidae		1
	5	3	2013	Location 2	Y	Hymenoptera	Bethylidae		1
	5	3	2013	Location 2	Y	Hymenoptera	Encyrtidae		2
	5	3	2013	Location 2	Y	Hymenoptera	Eulophidae		1
	5	3	2013	Location 2	Y	Hymenoptera	Formicidae		1
	5	3	2013	Location 2	Y	Hymenoptera	Halictidae		2
	5	3	2013	Location 2	Y	Hymenoptera	Ichneumonidae		4
	5	3	2013	Location 2	Y	Hymenoptera	Platygastridae		2
	5	3	2013	Location 2	Y	Hemiptera	Cicadellidae		1
	5	3	2013	Location 2	W	Diptera	Anthomyiidae		1
	5	3	2013	Location 2	W	Diptera	Dolichopodidae		2
	5	3	2013	Location 2	W	Diptera	Calliphoridae		1
	5	3	2013	Location 2	W	Diptera	Muscidae		1
	5	3	2013	Location 2	W	Diptera	Sarcophagidae		3
	5	3	2013	Location 2	W	Diptera	Sciaridae		1
	5	3	2013	Location 2	W	Diptera	Simuliidae		1
	5	3	2013	Location 2	W	Diptera	Tachinidae		3
	5	3	2013	Location 2	W	Hymenoptera	Halictidae		1
	3	5	2013	Location 2	B	Diptera	Dolichopodidae		21
	3	5	2013	Location 2	B	Diptera	Chloropidae		1
	3	5	2013	Location 2	B	Diptera	Phoridae		2
	3	5	2013	Location 2	B	Diptera	Sarcophagidae		2
	3	5	2013	Location 2	B	Hymenoptera	Eulophidae		1
	3	5	2013	Location 2	B	Hymenoptera	Halictidae		1
	3	5	2013	Location 2	B	Hemiptera	Cicadellidae		1
	3	5	2013	Location 2	R	Diptera	Cecidomyiidae		1
	3	5	2013	Location 2	R	Hymenoptera	Formicidae		1
	3	5	2013	Location 2	R	Hemiptera	Cicadellidae		2
	3	5	2013	Location 2	Y	Diptera	Dolichopodidae		36
	3	5	2013	Location 2	Y	Diptera	Phoridae		3
	3	5	2013	Location 2	Y	Diptera	Psychodidae		1
	3	5	2013	Location 2	Y	Hymenoptera	Formicidae		1
	3	5	2013	Location 2	Y	Hemiptera	Cicadellidae		1
	3	5	2013	Location 2	Y	Coleoptera	Chrysomelidae		1
	3	5	2013	Location 2	W	Diptera	Dolichopodidae		36
	3	5	2013	Location 2	W	Diptera	Phoridae		4
	3	5	2013	Location 2	W	Hymenoptera	Crabronidae		1
	3	5	2013	Location 2	W	Hemiptera	Cicadellidae		1
	16	5	2013	Location 2	B	Diptera	Anthomyiidae		3
	16	5	2013	Location 2	B	Diptera	Dolichopodidae		12
	16	5	2013	Location 2	B	Diptera	Lauxaniidae		1
	16	5	2013	Location 2	B	Diptera	Psychodidae		16
	16	5	2013	Location 2	B	Diptera	Sarcophagidae		1
	16	5	2013	Location 2	B	Hymenoptera	Encyrtidae		1
	16	5	2013	Location 2	B	Hymenoptera	Halictidae		1
	16	5	2013	Location 2	B	Hemiptera	Cicadellidae		1
	16	5	2013	Location 2	B	Hemiptera	Delphacidae		1
	16	5	2013	Location 2	B	Lepidoptera	Tineidae		5
	16	5	2013	Location 2	B	Lepidoptera	Copromorphidae		1
	16	5	2013	Location 2	B	Lepidoptera	Heliozelidae		1
	16	5	2013	Location 2	B	Coleoptera	Chrysomelidae		1
	16	5	2013	Location 2	R	Diptera	Dolichopodidae		2
	16	5	2013	Location 2	R	Diptera	Mycetophilidae		2
	16	5	2013	Location 2	R	Diptera	Psychodidae		1
	16	5	2013	Location 2	R	Diptera	Sciaridae		1
	16	5	2013	Location 2	R	Hymenoptera	Tiphiidae		1
	16	5	2013	Location 2	R	Hemiptera	Cicadellidae		3
	16	5	2013	Location 2	R	Coleoptera	Chrysomelidae		1
	16	5	2013	Location 2	Y	Diptera	Dolichopodidae		76
	16	5	2013	Location 2	Y	Diptera	Bibionidae		9
	16	5	2013	Location 2	Y	Diptera	Chloropidae		1
	16	5	2013	Location 2	Y	Diptera	Ephydridae		2
	16	5	2013	Location 2	Y	Diptera	Muscidae		1
	16	5	2013	Location 2	Y	Diptera	Sciaridae		1
	16	5	2013	Location 2	Y	Diptera	Tachinidae		1
	16	5	2013	Location 2	Y	Hymenoptera	Crabronidae		6
	16	5	2013	Location 2	Y	Hymenoptera	Mymaridae		1
	16	5	2013	Location 2	Y	Hymenoptera	Tiphiidae		6
	16	5	2013	Location 2	Y	Hymenoptera	Vespidae		1
	16	5	2013	Location 2	Y	Hemiptera	Cercopidae		1
	16	5	2013	Location 2	Y	Hemiptera	Cicadellidae		6
	16	5	2013	Location 2	Y	Lepidoptera	Tineidae		6
	16	5	2013	Location 2	Y	Lepidoptera	Heliozelidae		1
	16	5	2013	Location 2	Y	Lepidoptera	Sesiidae		1
	16	5	2013	Location 2	Y	Lepidoptera	Tortricidae		1
	16	5	2013	Location 2	Y	Coleoptera	Mordellidae		1
	16	5	2013	Location 2	W	Diptera	Anthomyiidae		3
	16	5	2013	Location 2	W	Diptera	Dolichopodidae		34
	16	5	2013	Location 2	W	Diptera	Bibionidae		4
	16	5	2013	Location 2	W	Diptera	Sarcophagidae		1
	16	5	2013	Location 2	W	Hymenoptera	Crabronidae		1
	16	5	2013	Location 2	W	Hymenoptera	Formicidae		1
	16	5	2013	Location 2	W	Hymenoptera	Halictidae		1
	16	5	2013	Location 2	W	Hemiptera	Cicadellidae		3
	16	5	2013	Location 2	W	Hemiptera	Miridae		2
	16	5	2013	Location 2	W	Lepidoptera	Tineidae		3
	16	5	2013	Location 2	W	Coleoptera	Chrysomelidae		2
	3	7	2013	Location 2	B	Diptera	Dolichopodidae		6
	3	7	2013	Location 2	B	Diptera	Chloropidae		1
	3	7	2013	Location 2	B	Diptera	Phoridae		1
	3	7	2013	Location 2	B	Diptera	Sarcophagidae		1
	3	7	2013	Location 2	B	Diptera	Scathophagidae		1
	3	7	2013	Location 2	B	Hymenoptera	Anthophoridae		1
	3	7	2013	Location 2	B	Hymenoptera	Formicidae		1
	3	7	2013	Location 2	B	Hymenoptera	Halictidae		3
	3	7	2013	Location 2	R	Diptera	Dolichopodidae		2
	3	7	2013	Location 2	R	Diptera	Drosophilidae		1
	3	7	2013	Location 2	R	Diptera	Chironomidae		1
	3	7	2013	Location 2	R	Diptera	Phoridae		1
	3	7	2013	Location 2	R	Diptera	Sciaridae		2
	3	7	2013	Location 2	R	Hymenoptera	Formicidae		2
	3	7	2013	Location 2	R	Coleoptera	Chrysomelidae		1
	3	7	2013	Location 2	R	Coleoptera	Hydraenidae		1
	3	7	2013	Location 2	Y	Diptera	Dolichopodidae		19
	3	7	2013	Location 2	Y	Diptera	Cecidomyiidae		1
	3	7	2013	Location 2	Y	Diptera	Chloropidae		1
	3	7	2013	Location 2	Y	Diptera	Lauxaniidae		1
	3	7	2013	Location 2	Y	Diptera	Phoridae		1
	3	7	2013	Location 2	Y	Diptera	Sarcophagidae		1
	3	7	2013	Location 2	Y	Hymenoptera	Crabronidae		2
	3	7	2013	Location 2	Y	Hymenoptera	Encyrtidae		1
	3	7	2013	Location 2	Y	Hymenoptera	Formicidae		2
	3	7	2013	Location 2	Y	Hymenoptera	Halictidae		3
	3	7	2013	Location 2	Y	Hymenoptera	Platygastridae		1
	3	7	2013	Location 2	Y	Hemiptera	Cicadellidae		5
	3	7	2013	Location 2	Y	Hemiptera	Miridae		1
	3	7	2013	Location 2	Y	Coleoptera	Erotylidae		1
	3	7	2013	Location 2	W	Diptera	Dolichopodidae		43
	3	7	2013	Location 2	W	Diptera	Cecidomyiidae		1
	3	7	2013	Location 2	W	Diptera	Chloropidae		1
	3	7	2013	Location 2	W	Diptera	Phoridae		3
	3	7	2013	Location 2	W	Diptera	Sarcophagidae		6
	3	7	2013	Location 2	W	Diptera	Scathophagidae		1
	3	7	2013	Location 2	W	Diptera	Sciaridae		5
	3	7	2013	Location 2	W	Hymenoptera	Crabronidae		1
	3	7	2013	Location 2	W	Hymenoptera	Encyrtidae		1
	3	7	2013	Location 2	W	Hymenoptera	Halictidae		3
	3	7	2013	Location 2	W	Hemiptera	Cicadellidae		2
	18	6	2013	Location 2	B	Diptera	Dolichopodidae		8
	18	6	2013	Location 2	B	Diptera	Cecidomyiidae		2
	18	6	2013	Location 2	B	Diptera	Chloropidae		3
	18	6	2013	Location 2	B	Diptera	Ephydridae		1
	18	6	2013	Location 2	B	Diptera	Lauxaniidae		1
	18	6	2013	Location 2	B	Diptera	Muscidae		1
	18	6	2013	Location 2	B	Hymenoptera	Formicidae		1
	18	6	2013	Location 2	B	Hymenoptera	Halictidae		3
	18	6	2013	Location 2	R	Diptera	Dolichopodidae		1
	18	6	2013	Location 2	R	Diptera	Cecidomyiidae		8
	18	6	2013	Location 2	R	Diptera	Chloropidae		1
	18	6	2013	Location 2	R	Diptera	Culicidae		1
	18	6	2013	Location 2	R	Hymenoptera	Formicidae		1
	18	6	2013	Location 2	R	Hymenoptera	Mymaridae		1
	18	6	2013	Location 2	R	Hymenoptera	Pompilidae		1
	18	6	2013	Location 2	R	Hemiptera	Cicadellidae		1
	18	6	2013	Location 2	R	Coleoptera	Scarabaeidae		1
	18	6	2013	Location 2	Y	Diptera	Dolichopodidae		31
	18	6	2013	Location 2	Y	Diptera	Calliphoridae		1
	18	6	2013	Location 2	Y	Diptera	Cecidomyiidae		1
	18	6	2013	Location 2	Y	Diptera	Empididae		3
	18	6	2013	Location 2	Y	Diptera	Ephydridae		5
	18	6	2013	Location 2	Y	Diptera	Psychodidae		1
	18	6	2013	Location 2	Y	Diptera	Sarcophagidae		11
	18	6	2013	Location 2	Y	Diptera	Tachinidae		1
	18	6	2013	Location 2	Y	Hymenoptera	Apidae		1
	18	6	2013	Location 2	Y	Hymenoptera	Crabronidae		7
	18	6	2013	Location 2	Y	Hymenoptera	Encyrtidae		1
	18	6	2013	Location 2	Y	Hymenoptera	Halictidae		1
	18	6	2013	Location 2	Y	Hymenoptera	Platygastridae		1
	18	6	2013	Location 2	Y	Hymenoptera	Tiphiidae		4
	18	6	2013	Location 2	Y	Hemiptera	Cercopidae		1
	18	6	2013	Location 2	Y	Hemiptera	Cicadellidae		6
	18	6	2013	Location 2	Y	Coleoptera	Attelabidae		1
	18	6	2013	Location 2	Y	Coleoptera	Coccinellidae		1
	18	6	2013	Location 2	W	Diptera	Dolichopodidae		32
	18	6	2013	Location 2	W	Diptera	Empididae		1
	18	6	2013	Location 2	W	Diptera	Phoridae		1
	18	6	2013	Location 2	W	Diptera	Sarcophagidae		3
	18	6	2013	Location 2	W	Diptera	Sciaridae		2
	18	6	2013	Location 2	W	Hymenoptera	Crabronidae		1
	18	6	2013	Location 2	W	Hymenoptera	Formicidae		3
	18	6	2013	Location 2	W	Hymenoptera	Halictidae		2
	18	6	2013	Location 2	W	Hemiptera	Cicadellidae		1
	25	7	2013	Location 2	B	Diptera	Agromyzidae		1
	25	7	2013	Location 2	B	Diptera	Dolichopodidae		29
	25	7	2013	Location 2	B	Diptera	Drosophilidae		4
	25	7	2013	Location 2	B	Diptera	Cecidomyiidae		6
	25	7	2013	Location 2	B	Diptera	Phoridae		1
	25	7	2013	Location 2	B	Diptera	Sarcophagidae		5
	25	7	2013	Location 2	B	Hymenoptera	Bethylidae		2
	25	7	2013	Location 2	B	Hymenoptera	Encyrtidae		1
	25	7	2013	Location 2	B	Hymenoptera	Formicidae		4
	25	7	2013	Location 2	B	Hymenoptera	Halictidae		10
	25	7	2013	Location 2	B	Hemiptera	Cercopidae		1
	25	7	2013	Location 2	B	Hemiptera	Cicadellidae		3
	25	7	2013	Location 2	B	Hemiptera	Delphacidae		1
	25	7	2013	Location 2	B	Coleoptera	Chrysomelidae		1
	25	7	2013	Location 2	R	Diptera	Dolichopodidae		2
	25	7	2013	Location 2	R	Diptera	Cecidomyiidae		2
	25	7	2013	Location 2	R	Diptera	Ceratopogonidae		1
	25	7	2013	Location 2	R	Diptera	Phoridae		1
	25	7	2013	Location 2	R	Diptera	Sciaridae		1
	25	7	2013	Location 2	R	Hymenoptera	Encyrtidae		2
	25	7	2013	Location 2	R	Hymenoptera	Formicidae		6
	25	7	2013	Location 2	Y	Diptera	Dolichopodidae		59
	25	7	2013	Location 2	Y	Diptera	Cecidomyiidae		3
	25	7	2013	Location 2	Y	Diptera	Phoridae		6
	25	7	2013	Location 2	Y	Diptera	Sarcophagidae		3
	25	7	2013	Location 2	Y	Diptera	Sciaridae		1
	25	7	2013	Location 2	Y	Diptera	Syrphidae		1
	25	7	2013	Location 2	Y	Hymenoptera	Encyrtidae		1
	25	7	2013	Location 2	Y	Hymenoptera	Formicidae		8
	25	7	2013	Location 2	Y	Hymenoptera	Halictidae		5
	25	7	2013	Location 2	Y	Hemiptera	Cercopidae		2
	25	7	2013	Location 2	Y	Hemiptera	Cicadellidae		4
	25	7	2013	Location 2	Y	Coleoptera	Chrysomelidae		1
	25	7	2013	Location 2	Y	Coleoptera	Staphylinidae		1
	25	7	2013	Location 2	W	Diptera	Dolichopodidae		69
	25	7	2013	Location 2	W	Diptera	Drosophilidae		3
	25	7	2013	Location 2	W	Diptera	Cecidomyiidae		2
	25	7	2013	Location 2	W	Diptera	Lauxaniidae		1
	25	7	2013	Location 2	W	Diptera	Phoridae		3
	25	7	2013	Location 2	W	Diptera	Sarcophagidae		11
	25	7	2013	Location 2	W	Hymenoptera	Crabronidae		1
	25	7	2013	Location 2	W	Hymenoptera	Formicidae		9
	25	7	2013	Location 2	W	Hymenoptera	Halictidae		3
	25	7	2013	Location 2	W	Hymenoptera	Sphecidae		1
	25	7	2013	Location 2	W	Hemiptera	Cicadellidae		2
	25	7	2013	Location 2	W	Coleoptera	Chrysomelidae		2
	25	7	2013	Location 2	W	Coleoptera	Staphylinidae		1
	20	8	2013	Location 2	B	Diptera	Dolichopodidae		17
	20	8	2013	Location 2	B	Diptera	Lauxaniidae		1
	20	8	2013	Location 2	B	Hymenoptera	Crabronidae		1
	20	8	2013	Location 2	B	Hymenoptera	Encyrtidae		1
	20	8	2013	Location 2	B	Hymenoptera	Formicidae		1
	20	8	2013	Location 2	B	Hymenoptera	Halictidae		4
	20	8	2013	Location 2	B	Hemiptera	Cicadellidae		1
	20	8	2013	Location 2	B	Hemiptera	Miridae		1
	20	8	2013	Location 2	R	Diptera	Dolichopodidae		2
	20	8	2013	Location 2	R	Diptera	Phoridae		1
	20	8	2013	Location 2	R	Diptera	Sciaridae		1
	20	8	2013	Location 2	R	Hymenoptera	Encyrtidae		1
	20	8	2013	Location 2	R	Hymenoptera	Formicidae		1
	20	8	2013	Location 2	R	Hymenoptera	Halictidae		1
	20	8	2013	Location 2	R	Hemiptera	Cicadellidae		3
	20	8	2013	Location 2	R	Coleoptera	Chrysomelidae		1
	20	8	2013	Location 2	R	Coleoptera	Coccinellidae		1
	20	8	2013	Location 2	Y	Diptera	Dolichopodidae		59
	20	8	2013	Location 2	Y	Diptera	Cecidomyiidae		1
	20	8	2013	Location 2	Y	Diptera	Chloropidae		1
	20	8	2013	Location 2	Y	Diptera	Sarcophagidae		2
	20	8	2013	Location 2	Y	Diptera	Sciaridae		1
	20	8	2013	Location 2	Y	Diptera	Tachinidae		1
	20	8	2013	Location 2	Y	Hymenoptera	Crabronidae		2
	20	8	2013	Location 2	Y	Hymenoptera	Encyrtidae		1
	20	8	2013	Location 2	Y	Hymenoptera	Formicidae		3
	20	8	2013	Location 2	Y	Hymenoptera	Halictidae		2
	20	8	2013	Location 2	Y	Hymenoptera	Mymaridae		1
	20	8	2013	Location 2	Y	Hemiptera	Cercopidae		1
	20	8	2013	Location 2	Y	Hemiptera	Cicadellidae		6
	20	8	2013	Location 2	Y	Coleoptera	Chrysomelidae		1
	20	8	2013	Location 2	Y	Coleoptera	Coccinellidae		1
	20	8	2013	Location 2	Y	Coleoptera	Curculionidae		1
	20	8	2013	Location 2	W	Diptera	Dolichopodidae		87
	20	8	2013	Location 2	W	Diptera	Drosophilidae		2
	20	8	2013	Location 2	W	Diptera	Phoridae		2
	20	8	2013	Location 2	W	Diptera	Sarcophagidae		2
	20	8	2013	Location 2	W	Hymenoptera	Formicidae		1
	20	8	2013	Location 2	W	Hymenoptera	Halictidae		3
	20	8	2013	Location 2	W	Hemiptera	Cercopidae		4
	20	8	2013	Location 2	W	Hemiptera	Cicadellidae		3
	20	8	2013	Location 2	W	Hemiptera	Miridae		1
	30	7	2013	Location 2	B	Diptera	Dolichopodidae		12
	30	7	2013	Location 2	B	Diptera	Cecidomyiidae		6
	30	7	2013	Location 2	B	Diptera	Sarcophagidae		3
	30	7	2013	Location 2	B	Diptera	Sciaridae		2
	30	7	2013	Location 2	B	Hymenoptera	Encyrtidae		1
	30	7	2013	Location 2	B	Hymenoptera	Formicidae		8
	30	7	2013	Location 2	B	Hymenoptera	Halictidae		4
	30	7	2013	Location 2	B	Hemiptera	Anthocoridae		2
	30	7	2013	Location 2	B	Hemiptera	Cercopidae		1
	30	7	2013	Location 2	B	Hemiptera	Cicadellidae		3
	30	7	2013	Location 2	R	Diptera	Dolichopodidae		4
	30	7	2013	Location 2	R	Diptera	Cecidomyiidae		3
	30	7	2013	Location 2	R	Diptera	Sciaridae		4
	30	7	2013	Location 2	R	Hymenoptera	Encyrtidae		1
	30	7	2013	Location 2	R	Hymenoptera	Formicidae		4
	30	7	2013	Location 2	R	Hemiptera	Cicadellidae		4
	30	7	2013	Location 2	R	Lepidoptera	Pyralidae		1
	30	7	2013	Location 2	R	Coleoptera	Chrysomelidae		2
	30	7	2013	Location 2	R	Coleoptera	Hydrophilidae		1
	30	7	2013	Location 2	Y	Diptera	Dolichopodidae		37
	30	7	2013	Location 2	Y	Diptera	Cecidomyiidae		4
	30	7	2013	Location 2	Y	Diptera	Lauxaniidae		1
	30	7	2013	Location 2	Y	Diptera	Phoridae		3
	30	7	2013	Location 2	Y	Diptera	Sarcophagidae		7
	30	7	2013	Location 2	Y	Diptera	Sciaridae		1
	30	7	2013	Location 2	Y	Hymenoptera	Crabronidae		3
	30	7	2013	Location 2	Y	Hymenoptera	Formicidae		10
	30	7	2013	Location 2	Y	Hymenoptera	Mymaridae		1
	30	7	2013	Location 2	Y	Hymenoptera	Platygastridae		1
	30	7	2013	Location 2	Y	Hymenoptera	Vespidae		1
	30	7	2013	Location 2	Y	Hemiptera	Cercopidae		2
	30	7	2013	Location 2	Y	Hemiptera	Cicadellidae		34
	30	7	2013	Location 2	W	Diptera	Anthomyiidae		1
	30	7	2013	Location 2	W	Diptera	Dolichopodidae		33
	30	7	2013	Location 2	W	Diptera	Drosophilidae		2
	30	7	2013	Location 2	W	Diptera	Cecidomyiidae		4
	30	7	2013	Location 2	W	Diptera	Phoridae		3
	30	7	2013	Location 2	W	Diptera	Sarcophagidae		7
	30	7	2013	Location 2	W	Hymenoptera	Formicidae		4
	30	7	2013	Location 2	W	Hymenoptera	Halictidae		1
	30	7	2013	Location 2	W	Hemiptera	Cercopidae		1
	30	7	2013	Location 2	W	Hemiptera	Cicadellidae		6
	3	9	2013	Location 2	B	Diptera	Dolichopodidae		42
	3	9	2013	Location 2	B	Diptera	Drosophilidae		3
	3	9	2013	Location 2	B	Diptera	Sarcophagidae		4
	3	9	2013	Location 2	B	Hymenoptera	Encyrtidae		5
	3	9	2013	Location 2	B	Hymenoptera	Formicidae		5
	3	9	2013	Location 2	B	Hymenoptera	Halictidae		4
	3	9	2013	Location 2	B	Hemiptera	Cercopidae		1
	3	9	2013	Location 2	B	Hemiptera	Cicadellidae		2
	3	9	2013	Location 2	B	Hemiptera	Delphacidae		2
	3	9	2013	Location 2	B	Coleoptera	Mordellidae		1
	3	9	2013	Location 2	R	Diptera	Agromyzidae		1
	3	9	2013	Location 2	R	Diptera	Dolichopodidae		9
	3	9	2013	Location 2	R	Diptera	Cecidomyiidae		1
	3	9	2013	Location 2	R	Diptera	Ceratopogonidae		1
	3	9	2013	Location 2	R	Diptera	Chloropidae		1
	3	9	2013	Location 2	R	Diptera	Phoridae		2
	3	9	2013	Location 2	R	Diptera	Sciaridae		1
	3	9	2013	Location 2	R	Hymenoptera	Encyrtidae		8
	3	9	2013	Location 2	R	Hymenoptera	Formicidae		2
	3	9	2013	Location 2	R	Hemiptera	Cicadellidae		6
	3	9	2013	Location 2	R	Hemiptera	Delphacidae		1
	3	9	2013	Location 2	Y	Diptera	Dolichopodidae		65
	3	9	2013	Location 2	Y	Diptera	Cecidomyiidae		3
	3	9	2013	Location 2	Y	Diptera	Chloropidae		4
	3	9	2013	Location 2	Y	Diptera	Heleomyzidae		1
	3	9	2013	Location 2	Y	Diptera	Lauxaniidae		1
	3	9	2013	Location 2	Y	Diptera	Phoridae		1
	3	9	2013	Location 2	Y	Diptera	Sarcophagidae		6
	3	9	2013	Location 2	Y	Diptera	Sepsidae		6
	3	9	2013	Location 2	Y	Diptera	Ulidiidae		1
	3	9	2013	Location 2	Y	Hymenoptera	Ceraphronidae		1
	3	9	2013	Location 2	Y	Hymenoptera	Crabronidae		2
	3	9	2013	Location 2	Y	Hymenoptera	Encyrtidae		5
	3	9	2013	Location 2	Y	Hymenoptera	Mymaridae		1
	3	9	2013	Location 2	Y	Hymenoptera	Platygastridae		1
	3	9	2013	Location 2	Y	Hymenoptera	Tiphiidae		2
	3	9	2013	Location 2	Y	Hemiptera	Cicadellidae		12
	3	9	2013	Location 2	Y	Hemiptera	Cixiidae		1
	3	9	2013	Location 2	Y	Hemiptera	Delphacidae		1
	3	9	2013	Location 2	W	Diptera	Dolichopodidae		106
	3	9	2013	Location 2	W	Diptera	Drosophilidae		2
	3	9	2013	Location 2	W	Diptera	Cecidomyiidae		1
	3	9	2013	Location 2	W	Diptera	Phoridae		7
	3	9	2013	Location 2	W	Diptera	Sarcophagidae		17
	3	9	2013	Location 2	W	Hymenoptera	Apidae		1
	3	9	2013	Location 2	W	Hymenoptera	Crabronidae		2
	3	9	2013	Location 2	W	Hymenoptera	Encyrtidae		6
	3	9	2013	Location 2	W	Hymenoptera	Formicidae		8
	3	9	2013	Location 2	W	Hymenoptera	Halictidae		5
	3	9	2013	Location 2	W	Hemiptera	Cicadellidae		11
	3	9	2013	Location 2	W	Hemiptera	Delphacidae		1
	18	9	2013	Location 2	B	Diptera	Dolichopodidae		50
	18	9	2013	Location 2	B	Diptera	Drosophilidae		7
	18	9	2013	Location 2	B	Diptera	Chloropidae		1
	18	9	2013	Location 2	B	Diptera	Sarcophagidae		4
	18	9	2013	Location 2	B	Hymenoptera	Crabronidae		2
	18	9	2013	Location 2	B	Hymenoptera	Encyrtidae		1
	18	9	2013	Location 2	B	Hymenoptera	Formicidae		20
	18	9	2013	Location 2	B	Hymenoptera	Halictidae		2
	18	9	2013	Location 2	B	Hemiptera	Cicadellidae		2
	18	9	2013	Location 2	B	Hemiptera	Delphacidae		1
	18	9	2013	Location 2	R	Diptera	Dolichopodidae		11
	18	9	2013	Location 2	R	Diptera	Bibionidae		1
	18	9	2013	Location 2	R	Diptera	Cecidomyiidae		3
	18	9	2013	Location 2	R	Diptera	Chloropidae		2
	18	9	2013	Location 2	R	Diptera	Phoridae		1
	18	9	2013	Location 2	R	Hymenoptera	Bethylidae		1
	18	9	2013	Location 2	R	Hymenoptera	Encyrtidae		3
	18	9	2013	Location 2	R	Hymenoptera	Formicidae		30
	18	9	2013	Location 2	R	Hemiptera	Cicadellidae		2
	18	9	2013	Location 2	R	Hemiptera	Delphacidae		2
	18	9	2013	Location 2	R	Lepidoptera	Tineidae		1
	18	9	2013	Location 2	Y	Diptera	Agromyzidae		1
	18	9	2013	Location 2	Y	Diptera	Dolichopodidae		85
	18	9	2013	Location 2	Y	Diptera	Drosophilidae		1
	18	9	2013	Location 2	Y	Diptera	Bibionidae		6
	18	9	2013	Location 2	Y	Diptera	Calliphoridae		1
	18	9	2013	Location 2	Y	Diptera	Cecidomyiidae		1
	18	9	2013	Location 2	Y	Diptera	Lauxaniidae		1
	18	9	2013	Location 2	Y	Diptera	Phoridae		1
	18	9	2013	Location 2	Y	Diptera	Sarcophagidae		3
	18	9	2013	Location 2	Y	Hymenoptera	Crabronidae		2
	18	9	2013	Location 2	Y	Hymenoptera	Encyrtidae		4
	18	9	2013	Location 2	Y	Hymenoptera	Formicidae		2
	18	9	2013	Location 2	Y	Hymenoptera	Halictidae		4
	18	9	2013	Location 2	Y	Hymenoptera	Ichneumonidae		1
	18	9	2013	Location 2	Y	Hymenoptera	Mymaridae		1
	18	9	2013	Location 2	Y	Hemiptera	Cercopidae		1
	18	9	2013	Location 2	Y	Hemiptera	Cicadellidae		27
	18	9	2013	Location 2	Y	Hemiptera	Delphacidae		3
	18	9	2013	Location 2	Y	Hemiptera	Miridae		2
	18	9	2013	Location 2	Y	Coleoptera	Attelabidae		1
	18	9	2013	Location 2	W	Diptera	Dolichopodidae		111
	18	9	2013	Location 2	W	Diptera	Drosophilidae		15
	18	9	2013	Location 2	W	Diptera	Bibionidae		4
	18	9	2013	Location 2	W	Diptera	Lauxaniidae		1
	18	9	2013	Location 2	W	Diptera	Phoridae		4
	18	9	2013	Location 2	W	Diptera	Sarcophagidae		11
	18	9	2013	Location 2	W	Hymenoptera	Apidae		1
	18	9	2013	Location 2	W	Hymenoptera	Encyrtidae		4
	18	9	2013	Location 2	W	Hymenoptera	Formicidae		2
	18	9	2013	Location 2	W	Hymenoptera	Halictidae		2
	18	9	2013	Location 2	W	Hemiptera	Cicadellidae		12
	18	9	2013	Location 2	W	Hemiptera	Delphacidae		1
	18	9	2013	Location 2	W	Hemiptera	Miridae		1
	15	10	2013	Location 2	B	Diptera	Dolichopodidae		18
	15	10	2013	Location 2	B	Diptera	Drosophilidae		21
	15	10	2013	Location 2	B	Diptera	Cecidomyiidae		1
	15	10	2013	Location 2	B	Diptera	Sarcophagidae		1
	15	10	2013	Location 2	B	Diptera	Sciaridae		1
	15	10	2013	Location 2	B	Hymenoptera	Diapriidae		1
	15	10	2013	Location 2	B	Hymenoptera	Formicidae		2
	15	10	2013	Location 2	B	Hemiptera	Cicadellidae		1
	15	10	2013	Location 2	B	Hemiptera	Delphacidae		2
	15	10	2013	Location 2	R	Diptera	Dolichopodidae		3
	15	10	2013	Location 2	R	Diptera	Cecidomyiidae		1
	15	10	2013	Location 2	R	Diptera	Phoridae		1
	15	10	2013	Location 2	R	Hymenoptera	Braconidae		1
	15	10	2013	Location 2	R	Hymenoptera	Formicidae		2
	15	10	2013	Location 2	R	Hymenoptera	Tiphiidae		1
	15	10	2013	Location 2	R	Hemiptera	Anthocoridae		1
	15	10	2013	Location 2	R	Hemiptera	Cicadellidae		2
	15	10	2013	Location 2	R	Hemiptera	Delphacidae		1
	15	10	2013	Location 2	R	Lepidoptera	Tineidae		2
	15	10	2013	Location 2	Y	Diptera	Dolichopodidae		24
	15	10	2013	Location 2	Y	Diptera	Chloropidae		4
	15	10	2013	Location 2	Y	Diptera	Phoridae		1
	15	10	2013	Location 2	Y	Diptera	Tachinidae		1
	15	10	2013	Location 2	Y	Hymenoptera	Diapriidae		1
	15	10	2013	Location 2	Y	Hymenoptera	Encyrtidae		2
	15	10	2013	Location 2	Y	Hymenoptera	Ichneumonidae		1
	15	10	2013	Location 2	Y	Hymenoptera	Tiphiidae		1
	15	10	2013	Location 2	Y	Hemiptera	Cercopidae		1
	15	10	2013	Location 2	W	Diptera	Dolichopodidae		35
	15	10	2013	Location 2	W	Diptera	Drosophilidae		20
	15	10	2013	Location 2	W	Diptera	Phoridae		1
	15	10	2013	Location 2	W	Hymenoptera	Halictidae		1
	15	10	2013	Location 2	W	Hymenoptera	Ichneumonidae		1
	15	10	2013	Location 2	W	Hemiptera	Cicadellidae		1
	15	10	2013	Location 2	W	Hemiptera	Delphacidae		1
	15	10	2013	Location 2	W	Lepidoptera	Tineidae		1
	1	10	2013	Location 2	B	Diptera	Agromyzidae		1
	1	10	2013	Location 2	B	Diptera	Dolichopodidae		24
	1	10	2013	Location 2	B	Diptera	Drosophilidae		5
	1	10	2013	Location 2	B	Diptera	Cecidomyiidae		2
	1	10	2013	Location 2	B	Diptera	Sciaridae		1
	1	10	2013	Location 2	B	Diptera	Tachinidae		1
	1	10	2013	Location 2	B	Hymenoptera	Formicidae		1
	1	10	2013	Location 2	B	Hymenoptera	Halictidae		1
	1	10	2013	Location 2	R	Diptera	Dolichopodidae		2
	1	10	2013	Location 2	R	Diptera	Cecidomyiidae		2
	1	10	2013	Location 2	R	Hymenoptera	Formicidae		1
	1	10	2013	Location 2	R	Hemiptera	Anthocoridae		1
	1	10	2013	Location 2	R	Hemiptera	Cicadellidae		1
	1	10	2013	Location 2	Y	Diptera	Dolichopodidae		60
	1	10	2013	Location 2	Y	Diptera	Cecidomyiidae		1
	1	10	2013	Location 2	Y	Diptera	Chloropidae		1
	1	10	2013	Location 2	Y	Diptera	Phoridae		1
	1	10	2013	Location 2	Y	Diptera	Sarcophagidae		4
	1	10	2013	Location 2	Y	Diptera	Sciaridae		1
	1	10	2013	Location 2	Y	Hymenoptera	Braconidae		1
	1	10	2013	Location 2	Y	Hymenoptera	Crabronidae		2
	1	10	2013	Location 2	Y	Hymenoptera	Encyrtidae		2
	1	10	2013	Location 2	Y	Hymenoptera	Eucoilidae		1
	1	10	2013	Location 2	Y	Hymenoptera	Formicidae		1
	1	10	2013	Location 2	Y	Hymenoptera	Halictidae		1
	1	10	2013	Location 2	Y	Hymenoptera	Tiphiidae		1
	1	10	2013	Location 2	Y	Hemiptera	Cicadellidae		8
	1	10	2013	Location 2	Y	Hemiptera	Miridae		1
	1	10	2013	Location 2	W	Diptera	Dolichopodidae		53
	1	10	2013	Location 2	W	Diptera	Drosophilidae		1
	1	10	2013	Location 2	W	Diptera	Bibionidae		1
	1	10	2013	Location 2	W	Diptera	Cecidomyiidae		1
	1	10	2013	Location 2	W	Diptera	Sarcophagidae		5
	1	10	2013	Location 2	W	Diptera	Sciaridae		1
	1	10	2013	Location 2	W	Hymenoptera	Halictidae		1
	1	10	2013	Location 2	W	Hemiptera	Cicadellidae		4
	1	10	2013	Location 2	W	Coleoptera	Chrysomelidae		1
	4	11	2013	Location 2	B	Diptera	Dolichopodidae		8
	4	11	2013	Location 2	B	Diptera	Drosophilidae		30
	4	11	2013	Location 2	B	Diptera	Muscidae		3
	4	11	2013	Location 2	B	Diptera	Phoridae		1
	4	11	2013	Location 2	B	Hymenoptera	Diapriidae		1
	4	11	2013	Location 2	B	Hymenoptera	Halictidae		2
	4	11	2013	Location 2	B	Hemiptera	Cercopidae		1
	4	11	2013	Location 2	B	Hemiptera	Cicadellidae		2
	4	11	2013	Location 2	B	Hemiptera	Delphacidae		2
	4	11	2013	Location 2	R	Diptera	Cecidomyiidae		1
	4	11	2013	Location 2	R	Diptera	Psychodidae		1
	4	11	2013	Location 2	R	Diptera	Sciaridae		2
	4	11	2013	Location 2	R	Hymenoptera	Formicidae		1
	4	11	2013	Location 2	R	Hemiptera	Cicadellidae		1
	4	11	2013	Location 2	R	Hemiptera	Miridae		11
	4	11	2013	Location 2	Y	Diptera	Dolichopodidae		19
	4	11	2013	Location 2	Y	Diptera	Drosophilidae		1
	4	11	2013	Location 2	Y	Diptera	Cecidomyiidae		1
	4	11	2013	Location 2	Y	Diptera	Chloropidae		3
	4	11	2013	Location 2	Y	Diptera	Phoridae		2
	4	11	2013	Location 2	Y	Diptera	Sarcophagidae		2
	4	11	2013	Location 2	Y	Diptera	Sepsidae		1
	4	11	2013	Location 2	Y	Diptera	Stratiomyidae		1
	4	11	2013	Location 2	Y	Diptera	Tachinidae		1
	4	11	2013	Location 2	Y	Hymenoptera	Encyrtidae		3
	4	11	2013	Location 2	Y	Hymenoptera	Eucharitidae		1
	4	11	2013	Location 2	Y	Hymenoptera	Eucoilidae		1
	4	11	2013	Location 2	Y	Hymenoptera	Halictidae		2
	4	11	2013	Location 2	Y	Hymenoptera	Platygastridae		1
	4	11	2013	Location 2	Y	Hymenoptera	Tiphiidae		4
	4	11	2013	Location 2	Y	Hemiptera	Miridae		4
	4	11	2013	Location 2	W	Diptera	Dolichopodidae		18
	4	11	2013	Location 2	W	Diptera	Drosophilidae		59
	4	11	2013	Location 2	W	Diptera	Cecidomyiidae		2
	4	11	2013	Location 2	W	Diptera	Chloropidae		1
	4	11	2013	Location 2	W	Diptera	Muscidae		1
	4	11	2013	Location 2	W	Diptera	Phoridae		3
	4	11	2013	Location 2	W	Diptera	Sarcophagidae		3
	4	11	2013	Location 2	W	Diptera	Tachinidae		1
	4	11	2013	Location 2	W	Diptera	Tipulidae		2
	4	11	2013	Location 2	W	Hymenoptera	Encyrtidae		1
	4	11	2013	Location 2	W	Hymenoptera	Halictidae		1
	4	11	2013	Location 2	W	Hymenoptera	Pompilidae		1
	4	11	2013	Location 2	W	Hemiptera	Miridae		1
	4	11	2013	Location 2	W	Lepidoptera	Tineidae		1
	18	11	2013	Location 2	B	Diptera	Dolichopodidae		3
	18	11	2013	Location 2	B	Diptera	Drosophilidae		26
	18	11	2013	Location 2	B	Diptera	Muscidae		1
	18	11	2013	Location 2	B	Diptera	Phoridae		1
	18	11	2013	Location 2	B	Diptera	Psychodidae		1
	18	11	2013	Location 2	B	Hymenoptera	Megachilidae		1
	18	11	2013	Location 2	R	Hemiptera	Delphacidae		1
	18	11	2013	Location 2	R	Coleoptera	Latridiidae		1
	18	11	2013	Location 2	Y	Diptera	Dolichopodidae		20
	18	11	2013	Location 2	Y	Diptera	Chloropidae		13
	18	11	2013	Location 2	Y	Diptera	Lauxaniidae		1
	18	11	2013	Location 2	Y	Diptera	Sciaridae		1
	18	11	2013	Location 2	Y	Diptera	Syrphidae		1
	18	11	2013	Location 2	Y	Diptera	Tachinidae		4
	18	11	2013	Location 2	Y	Hymenoptera	Aphelinidae		1
	18	11	2013	Location 2	Y	Hymenoptera	Braconidae		1
	18	11	2013	Location 2	Y	Hymenoptera	Encyrtidae		1
	18	11	2013	Location 2	Y	Hymenoptera	Formicidae		1
	18	11	2013	Location 2	Y	Hymenoptera	Halictidae		7
	18	11	2013	Location 2	Y	Hymenoptera	Ichneumonidae		1
	18	11	2013	Location 2	Y	Hymenoptera	Tiphiidae		4
	18	11	2013	Location 2	Y	Hemiptera	Delphacidae		1
	18	11	2013	Location 2	Y	Hemiptera	Miridae		2
	18	11	2013	Location 2	W	Diptera	Dolichopodidae		10
	18	11	2013	Location 2	W	Diptera	Drosophilidae		18
	18	11	2013	Location 2	W	Diptera	Chloropidae		13
	18	11	2013	Location 2	W	Diptera	Empididae		1
	18	11	2013	Location 2	W	Diptera	Ephydridae		1
	18	11	2013	Location 2	W	Diptera	Lauxaniidae		1
	18	11	2013	Location 2	W	Diptera	Muscidae		1
	18	11	2013	Location 2	W	Diptera	Phoridae		2
	18	11	2013	Location 2	W	Diptera	Sarcophagidae		6
	18	11	2013	Location 2	W	Diptera	Sciaridae		1
	18	11	2013	Location 2	W	Hymenoptera	Halictidae		2
	18	11	2013	Location 2	W	Hemiptera	Cicadellidae		3
	18	11	2013	Location 2	W	Hemiptera	Miridae		1
	18	11	2013	Location 2	W	Coleoptera	Chrysomelidae		1
	9	12	2013	Location 2	B	Diptera	Dolichopodidae		3
	9	12	2013	Location 2	B	Diptera	Sciaridae		2
	9	12	2013	Location 2	R	Diptera	Sciaridae		1
	9	12	2013	Location 2	R	Hymenoptera	Formicidae		3
	9	12	2013	Location 2	R	Hemiptera	Cicadellidae		1
	9	12	2013	Location 2	R	Hemiptera	Delphacidae		1
	9	12	2013	Location 2	Y	Diptera	Dolichopodidae		1
	9	12	2013	Location 2	Y	Diptera	Drosophilidae		1
	9	12	2013	Location 2	Y	Diptera	Cecidomyiidae		1
	9	12	2013	Location 2	Y	Diptera	Ceratopogonidae		1
	9	12	2013	Location 2	Y	Diptera	Chloropidae		3
	9	12	2013	Location 2	Y	Diptera	Phoridae		2
	9	12	2013	Location 2	Y	Diptera	Sciaridae		2
	9	12	2013	Location 2	Y	Hymenoptera	Braconidae		2
	9	12	2013	Location 2	Y	Hymenoptera	Diapriidae		1
	9	12	2013	Location 2	Y	Hymenoptera	Encyrtidae		1
	9	12	2013	Location 2	Y	Hymenoptera	Formicidae		1
	9	12	2013	Location 2	Y	Hymenoptera	Tiphiidae		2
	9	12	2013	Location 2	Y	Hemiptera	Cicadellidae		2
	9	12	2013	Location 2	Y	Hemiptera	Delphacidae		1
	9	12	2013	Location 2	W	Diptera	Dolichopodidae		2
	9	12	2013	Location 2	W	Diptera	Empididae		1
	9	12	2013	Location 2	W	Diptera	Phoridae		2
	9	12	2013	Location 2	W	Hymenoptera	Ichneumonidae		1
	9	12	2013	Location 2	W	Hemiptera	Cicadellidae		2
90927	8	4	2014	Location 2	B	Diptera	Dolichopodidae	1	2
90927	8	4	2014	Location 2	B	Diptera	Chloropidae	1	1
90927	8	4	2014	Location 2	B	Diptera	Lauxaniidae	1	1
90927	8	4	2014	Location 2	B	Diptera	Scathophagidae	1	1
90927	8	4	2014	Location 2	B	Lepidoptera	Tineidae	1	1
85632	8	4	2014	Location 2	R	Diptera	Simuliidae	1	1
85632	8	4	2014	Location 2	R	Hymenoptera	Cynipidae	1	1
42160	8	4	2014	Location 2	Y	Diptera	Dolichopodidae	1	1
42160	8	4	2014	Location 2	Y	Diptera	Chloropidae	1	2
42160	8	4	2014	Location 2	Y	Diptera	Lauxaniidae	1	1
42160	8	4	2014	Location 2	Y	Diptera	Mycetophilidae	1	1
42160	8	4	2014	Location 2	Y	Diptera	Phoridae	1	1
42160	8	4	2014	Location 2	Y	Hymenoptera	Braconidae	1	1
42160	8	4	2014	Location 2	Y	Hymenoptera	Ceratopogonidae	1	1
[truncated: 38,829 more rows]

## Sheet: Order-Family
Family	Order
Agromyzidae	Diptera
Anthomyiidae	Diptera
Asilidae	Diptera
Aulacigastridae	Diptera
Dolichopodidae	Diptera
Drosophilidae	Diptera
Bibionidae	Diptera
Bombyliidae	Diptera
Calliphoridae	Diptera
Canacidae	Diptera
Carnidae	Diptera
Cecidomyiidae	Diptera
Ceratopogonidae	Diptera
Chironomidae	Diptera
Chloropidae	Diptera
Conopidae	Diptera
Culicidae	Diptera
Empididae	Diptera
Ephydridae	Diptera
Heleomyzidae	Diptera
Lauxaniidae	Diptera
Micropezidae	Diptera
Milichiidae	Diptera
Muscidae	Diptera
Mycetophilidae	Diptera
Phoridae	Diptera
Piophilidae	Diptera
Pipunculidae	Diptera
Platypezidae	Diptera
Platystomatidae	Diptera
Psychodidae	Diptera
Rhinophoridae	Diptera
Sarcophagidae	Diptera
Scathophagidae	Diptera
Scatopsidae	Diptera
Sciaridae	Diptera
Sepsidae	Diptera
Simuliidae	Diptera
Sphaeroceridae	Diptera
Stratiomyidae	Diptera
Syrphidae	Diptera
Tachinidae	Diptera
Tephritidae	Diptera
Therevidae	Diptera
Tipulidae	Diptera
Ulidiidae	Diptera
Xylophagidae	Diptera
Ampulicidae	Hymenoptera
Andrenidae	Hymenoptera
Anthophoridae	Hymenoptera
Apidae	Hymenoptera
Aphelinidae	Hymenoptera
Bethylidae	Hymenoptera
Braconidae	Hymenoptera
Ceraphronidae	Hymenoptera
Chalcididae	Hymenoptera
Charipidae	Hymenoptera
Chrysididae	Hymenoptera
Crabronidae	Hymenoptera
Cynipidae	Hymenoptera
Diapriidae	Hymenoptera
Dryinidae	Hymenoptera
Elasmidae	Hymenoptera
Encyrtidae	Hymenoptera
Eucharitidae	Hymenoptera
Eucoilidae	Hymenoptera
Eulophidae	Hymenoptera
Eupelmidae	Hymenoptera
Eurytomidae	Hymenoptera
Evaniidae	Hymenoptera
Figitidae	Hymenoptera
Formicidae	Hymenoptera
Halictidae	Hymenoptera
Ichneumonidae	Hymenoptera
Megachilidae	Hymenoptera
Megaspilidae	Hymenoptera
Mutillidae	Hymenoptera
Mymaridae	Hymenoptera
Ormyridae	Hymenoptera
Pergidae	Hymenoptera
Platygastridae	Hymenoptera
Pompilidae	Hymenoptera
Proctotrupidae	Hymenoptera
Pteromalidae	Hymenoptera
Scoliidae	Hymenoptera
Sphecidae	Hymenoptera
Tiphiidae	Hymenoptera
Torymidae	Hymenoptera
Vespidae	Hymenoptera
Xiphydriidae	Hymenoptera
Achilidae	Hemiptera
Alydidae	Hemiptera
Anthocoridae	Hemiptera
Aradidae	Hemiptera
Berytidae	Hemiptera
Blissidae	Hemiptera
Cercopidae	Hemiptera
Cicadellidae	Hemiptera
Cixiidae	Hemiptera
Coreidae	Hemiptera
Cydnidae	Hemiptera
Delphacidae	Hemiptera
Derbidae	Hemiptera
Dictyopharidae	Hemiptera
Flatidae	Hemiptera
Geocoridae	Hemiptera
Lasiochilidae	Hemiptera
Lygaeidae	Hemiptera
Margarodidae	Hemiptera
Membracidae	Hemiptera
Miridae	Hemiptera
Nabidae	Hemiptera
Oxycarenidae	Hemiptera
Pachygronthidae	Hemiptera
Pentatomidae	Hemiptera
Plataspidae	Hemiptera
Psyllidae	Hemiptera
Reduviidae	Hemiptera
Rhopalidae	Hemiptera
Rhyparochromidae	Hemiptera
Thyreocoridae	Hemiptera
Tingidae	Hemiptera
Tineidae	Lepidoptera
Adelidae	Lepidoptera
Coleophoridae	Lepidoptera
Copromorphidae	Lepidoptera
Cosmopterigidae	Lepidoptera
Crambidae	Lepidoptera
Elastichidae	Lepidoptera
Gelechiidae	Lepidoptera
Geometridae	Lepidoptera
Gracillariidae	Lepidoptera
Heliodinidae	Lepidoptera
Heliozelidae	Lepidoptera
Hesperiidae	Lepidoptera
Lycaenidae	Lepidoptera
Nepticulidae	Lepidoptera
Noctuidae	Lepidoptera
Notodontidae	Lepidoptera
Nymphalidae	Lepidoptera
Papilionidae	Lepidoptera
Pieridae	Lepidoptera
Plutellidae	Lepidoptera
Prodoxidae	Lepidoptera
Pyralidae	Lepidoptera
Sesiidae	Lepidoptera
Tortricidae	Lepidoptera
Yponomeutidae	Lepidoptera
Anobiidae	Coleoptera
Anthicidae	Coleoptera
Attelabidae	Coleoptera
Bostrichidae	Coleoptera
Buprestidae	Coleoptera
Cantharidae	Coleoptera
Carabidae	Coleoptera
Cerylonidae	Coleoptera
Chrysomelidae	Coleoptera
Coccinellidae	Coleoptera
Cryptophagidae	Coleoptera
Curculionidae	Coleoptera
Dermestidae	Coleoptera
Elateridae	Coleoptera
Endomychidae	Coleoptera
Erotylidae	Coleoptera
Eucnemidae	Coleoptera
Histeridae	Coleoptera
Hydraenidae	Coleoptera
Hydrophilidae	Coleoptera
Laemophloeidae	Coleoptera
Latridiidae	Coleoptera
Leiodidae	Coleoptera
Limnichidae	Coleoptera
Lycidae	Coleoptera
Meloidae	Coleoptera
Mordellidae	Coleoptera
Mycetophagidae	Coleoptera
Nitidulidae	Coleoptera
Ptiliidae	Coleoptera
Ptinidae	Coleoptera
Pyrochroidae	Coleoptera
Scarabaeidae	Coleoptera
Scirtidae	Coleoptera
Silvanidae	Coleoptera
Sphindidae	Coleoptera
Staphylinidae	Coleoptera
Tenebrionidae	Coleoptera
Trogossitidae	Coleoptera
